# Supplementary material for: Can China achieve a one-third reduction in premature mortality from non-communicable diseases by 2030?
Source: Springer Nature journal article supplement (doi:10.1186/s12916-017-0894-5), 2017-07-06
Supplement: MOESM1 [file 13295412]

## **Appendix to Can China Achieve a One-third Reduction in Premature Mortality from Non-communicable Diseases by 2030?**

This appendix provide more methodological detail, plots of projection by sex, and results of validation analysis.

### **Table of Contents**

|                                           |    |
|-------------------------------------------|----|
| Projection of NCD mortality in 2030 ..... | 2  |
| Additional file Figures .....             | 5  |
| Additional file Tables.....               | 16 |

## Projection of NCD mortality in 2030

Projection of NCD mortality was conducted in three steps for each age-sex-cause-year group. First, we categorized all deaths into deaths that can be attributed to the aforementioned risk factors and non-attributable parts, according to the theory of comparative risk assessment.<sup>1</sup> For continuous risk factors, such as BMI, SBP, TC, and FPG, the formula for the population attributable fraction (PAF) is as follows:

$$PAF = \frac{\int_{x=0}^m RR(x)P1(x) dx - \int_{x=0}^m RR(x)P2(x) dx}{\int_{x=0}^m RR(x)P1(x) dx}$$

where  $RR(x)$  is the RR of a certain disease for exposure level  $x$ ,  $P1(x)$  is the population distribution of the exposure,  $P2(x)$  is the minimum theoretical exposure distribution, and  $m$  is the maximum exposure level. The minimum theoretical exposure is the counterfactual condition of exposure, and was defined previously for each risk factor.<sup>2</sup>

With regard to categorical risk factors (smoking and physical inactivity), the formula for PAF is:

$$PAF = \frac{\sum_{i=1}^n P_i(RR_i - 1)}{\sum_{i=1}^n P_i(RR_i - 1) + 1}$$

Where  $i$  is exposure level,  $RR_i$  is RR for exposure level  $i$ , and  $P_i$  is the prevalence of exposure level  $i$ .

Estimated PAFs divided total deaths into attributable and non-attributable parts. The attributable part was calculated by multiplying PAF and total deaths, while the non-attributable part was total deaths minus the attributable part. Deaths attributable and non-attributable to NCDs were estimated by age, sex, and year separately between 1990 and 2013.

The second step was to project risk factor exposure and non-attributable deaths in 2030. A proportional change model was adopted to estimate the annual change rate in risk factor exposure and non-attributable deaths from 1990 to 2013. Assuming the observed trends continue similarly into the future, we obtained estimates of exposure in 2030 using the following formula with constant annual change rate:

$$Exposure_{2030} = exposure_{2013} * \exp\left(\frac{\ln\left(\frac{exposure_{2013}}{exposure_{1990}}\right)}{23} * 17\right)$$

With projected exposure in 2030 and RRs from GBD 2013, we estimated PAF in 2030 for each risk-outcome pair. Non-attributable deaths for a specific disease in 2030 was projected similarly by replacing exposure level with non-attributable deaths in the proportional change model. The total deaths in 2030 for the disease was then projected by the following formula:

$$Total\ deaths_{2030} = (unattributable\ deaths_{2030} / (1 - PAF_{2030}))$$

Based on the targets suggested by WHO on risk reduction to control NCDs,<sup>3</sup> we simulated eight separate scenarios to explore the potential effects of risk factor reduction on premature mortality from NCDs. Table 1 summarizes each scenario. For the scenario in which all targets are achieved, we

calculated the joint PAF of all risk factors using the following formula. The mediation factors were estimated using GBD 2013, <sup>1</sup> as some behavioral risk factors are mediated through other factors, e.g., a certain degree of hazard in ischemic heart disease associated with obesity is mediated through elevated fasting plasma glucose and total cholesterol.

$$PAF_{oast} = 1 - \prod_{j=1}^J (1 - PAF_{ioast} \prod_{i=1}^J (1 - MF_{jio}))$$

Where  $J$  is the number of risk factors for calculating the joint effect,  $PAF_{ioast}$  is the attributable fraction of  $i$  risk factor,  $MF_{jio}$  is the mediation factor between risk factor  $i$  and a certain disease  $o$  through risk factor  $j$ ,  $a$  was the age group,  $s$  was sex, and  $t$  was year.

Third, premature mortality for total NCDs and the main subcategories under each scenario were projected for 2030. Premature mortality was defined as the probability of dying between ages 30 and 70 years from NCDs and was estimated using age-specific death rates (in 5-year age groups between 30 and 70 years) with a life table techniques with the following formulas. <sup>4</sup>

First, five-year death rates ( ${}^5M_x$ ) was calculated:

$${}^5M_x = \frac{\text{Total deaths from a specific disease between exact age } x \text{ and exact age } x + 5}{\text{Total population between exact age } x \text{ and exact age } x + 5}$$

For each five-year age group, the probability of death from the disease ( ${}^5q_x$ ) was calculated:

$${}^5q_x = \frac{{}^5M_x * 5}{1 + {}^5M_x * 2.5}$$

The unconditional probability of death, for the 30-70 age range, was calculated last:

$${}_{40}q_{30} = 1 - \prod_{x=30}^{65} (1 - {}^5q_x)$$

The age-specific death rate under each scenario was calculated as the estimated deaths divided by the population. The sex- and age-specific population in 2030 was projected by the Population Division of United Nations (UN).

All data were prepared and analyzed in SAS 9.4. Efigure 1 shows the flowchart of this study.

## References

1. Forouzanfar MH, Alexander L, Anderson HR, et al. Global, regional, and national comparative risk assessment of 79 behavioural, environmental and occupational, and metabolic risks or clusters of risks in 188 countries, 1990-2013: a systematic analysis for the Global Burden of Disease Study 2013. *Lancet* 2015; **386**(10010): 2287-323.
2. Lim SS, Vos T, Flaxman AD, et al. A comparative risk assessment of burden of disease and injury attributable to 67 risk factors and risk factor clusters in 21 regions, 1990-2010: a systematic analysis for the Global Burden of Disease Study 2010. *Lancet* 2012; **380**(9859): 2224-60.
3. WHO. Monitoring framework and targets for the prevention and control of NCDs. Revised WHO discussion paper on the development of a comprehensive global monitoring framework, including indicators, and a set of voluntary global targets for the prevention and control of NCDs. July 25, 2012. [http://www.who.int/nmh/events/2012/ncd\\_discussion\\_paper/en](http://www.who.int/nmh/events/2012/ncd_discussion_paper/en) (accessed April 10, 2016) .
4. World Health Organization. Global status report on noncommunicable diseases 2014. 2014. Geneva. WHO Press.



Additional file Figures

Figure S1 Flowchart of the study design and data processing\*.

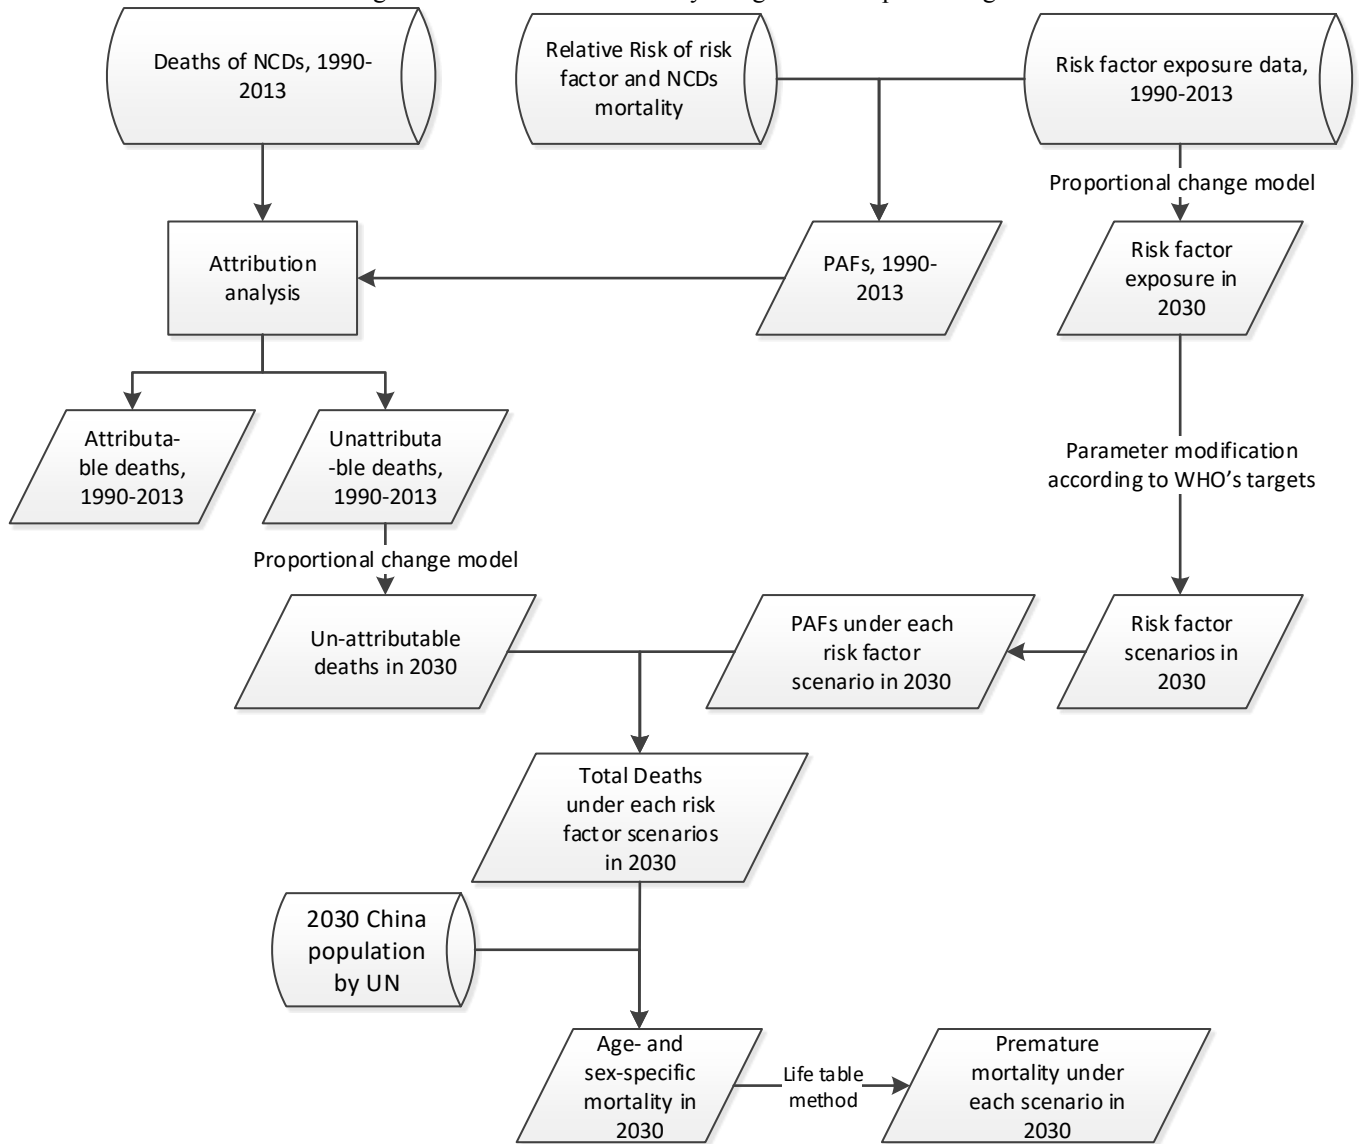

\*All analyses were performed separately by age, sex, year, and NCD causes.

Figure S2

Probability of premature death due to NCDs between ages 30-70 in China from 1990 to 2030-Male

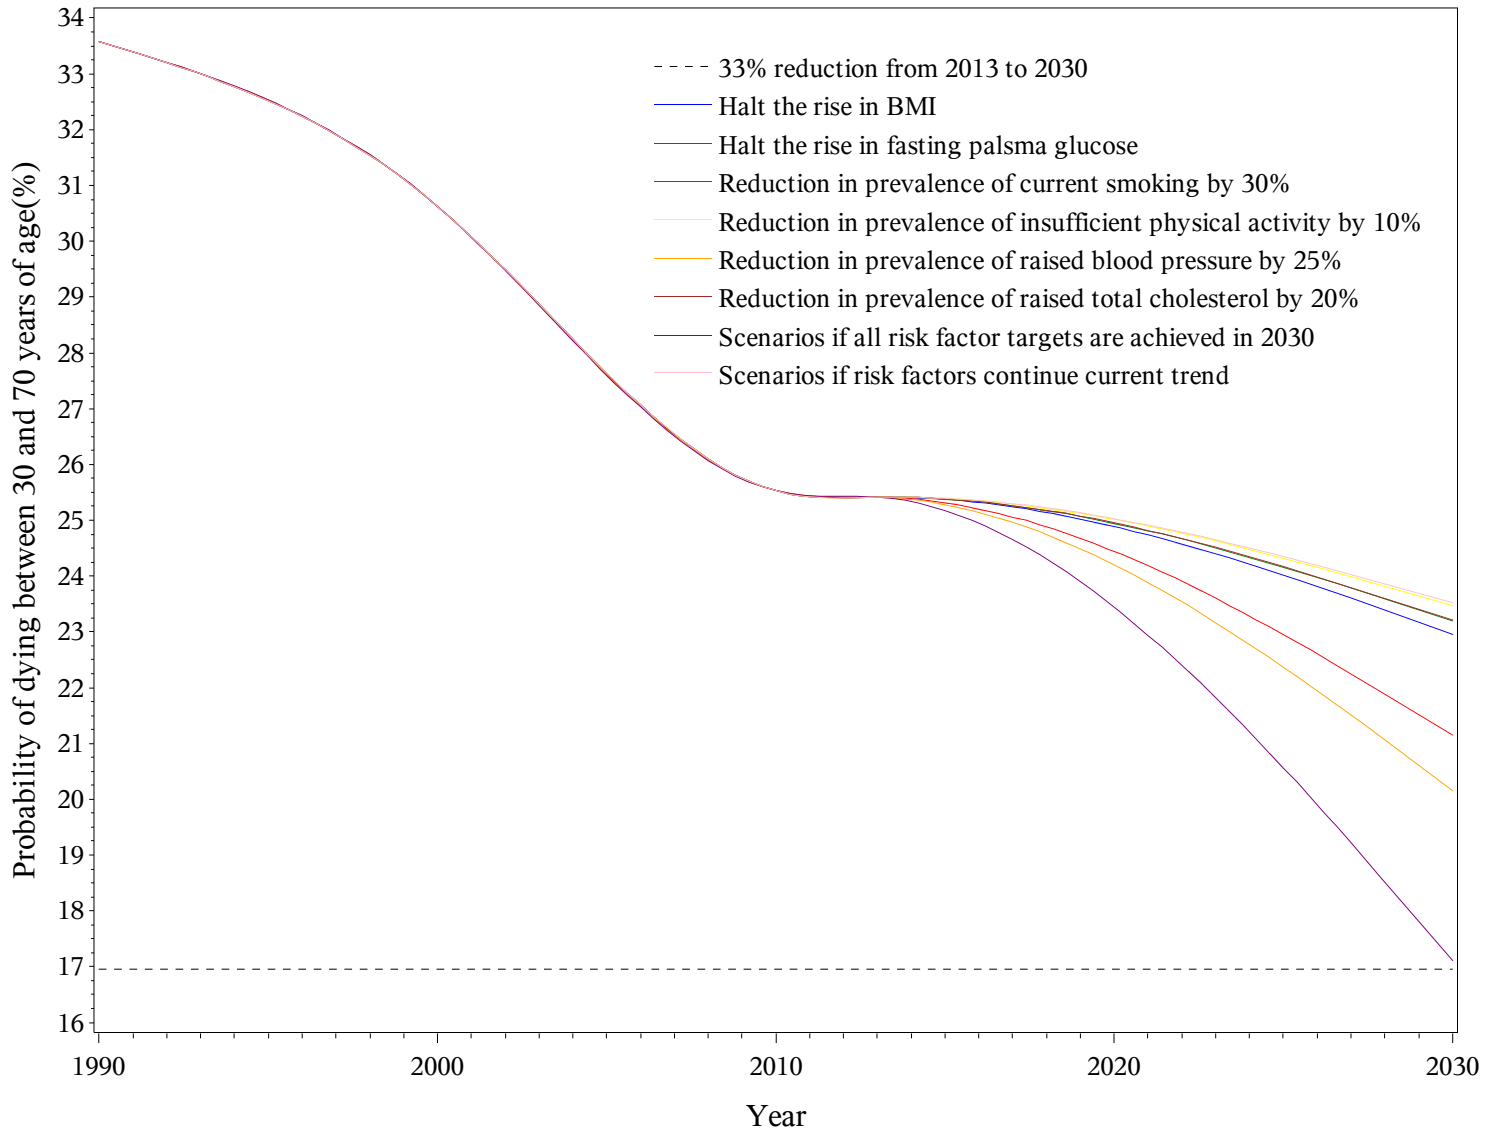

Figure S3

# Probability of premature death due to NCDs between ages 30-70 in China from 1990 to 2030-Female

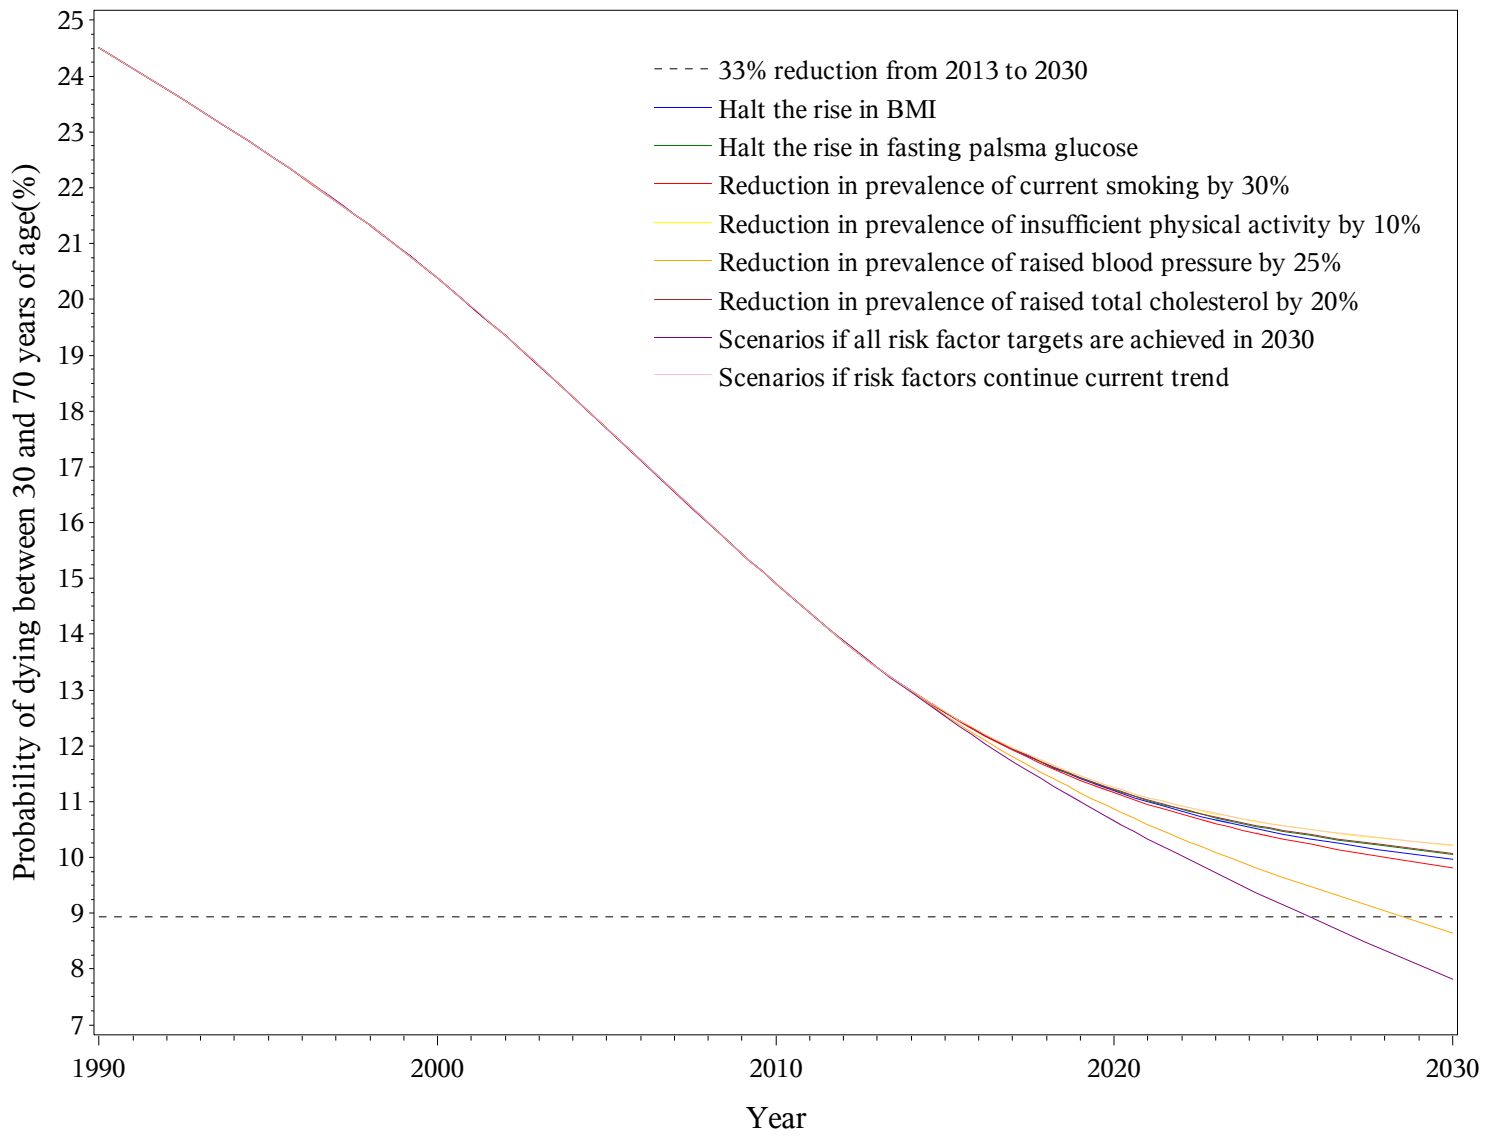

Figure S4

Probability of premature death due to Cardiovascular disease between ages 30-70 in China from 1990 to 2030-Male

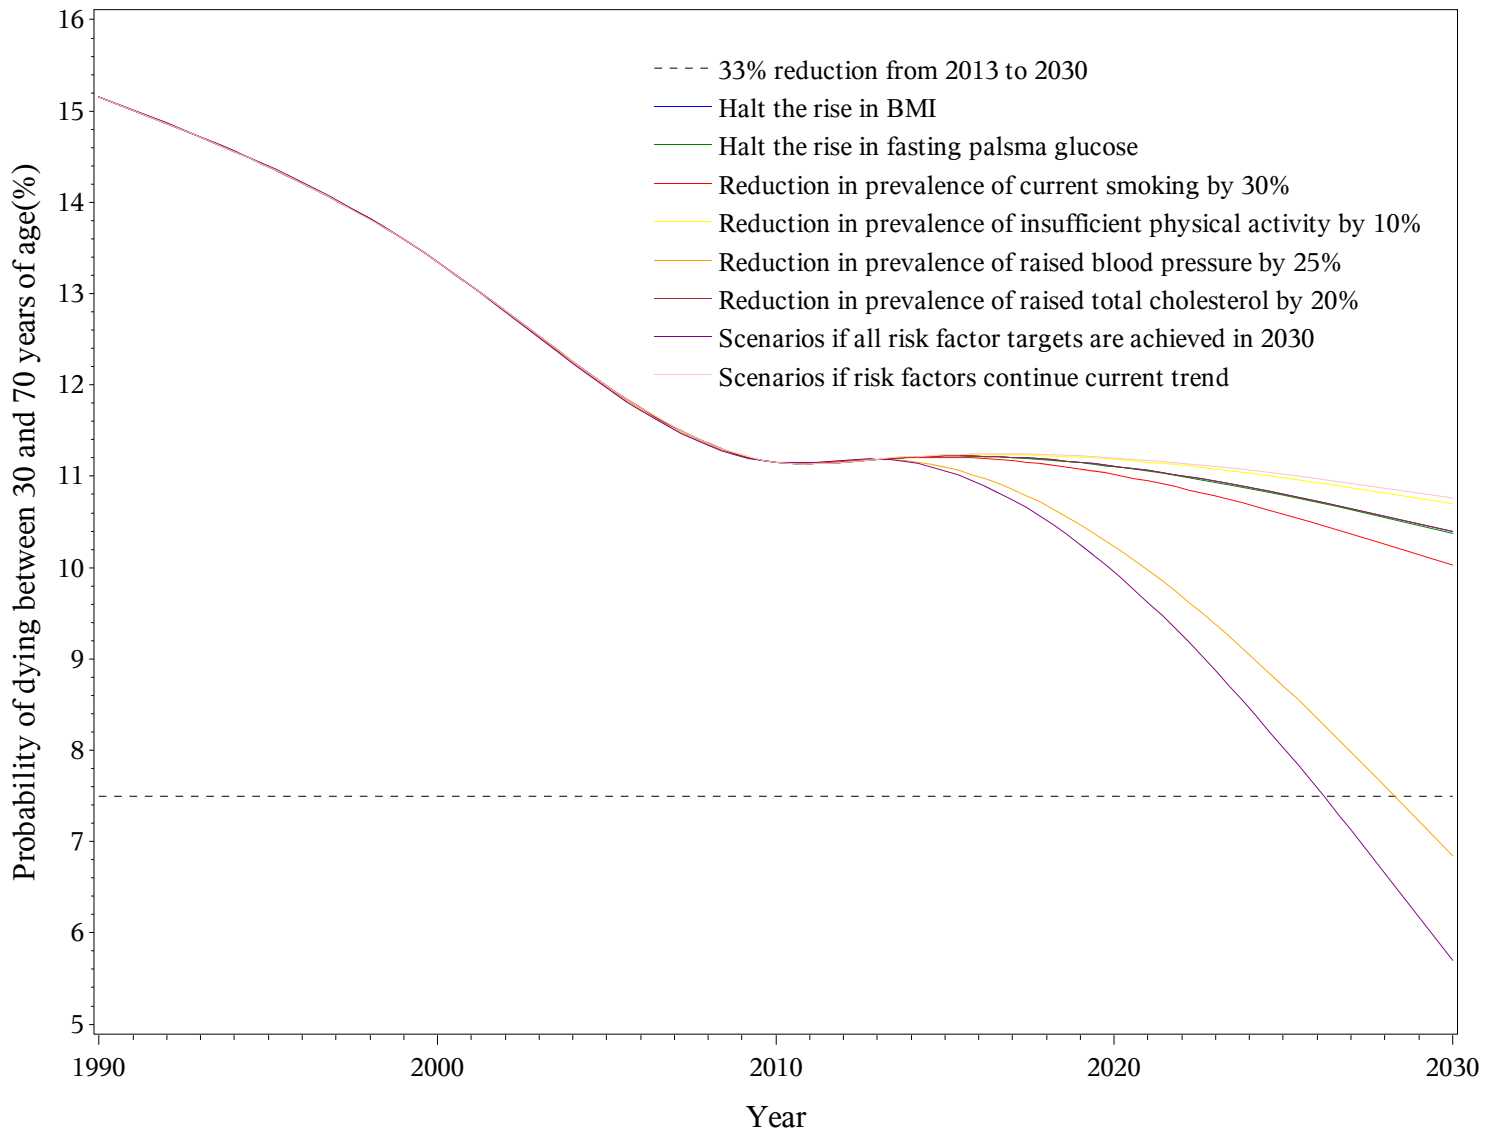

Figure S5

Probability of premature death due to Cardiovascular disease between ages 30-70 in China from 1990 to 2030-Female

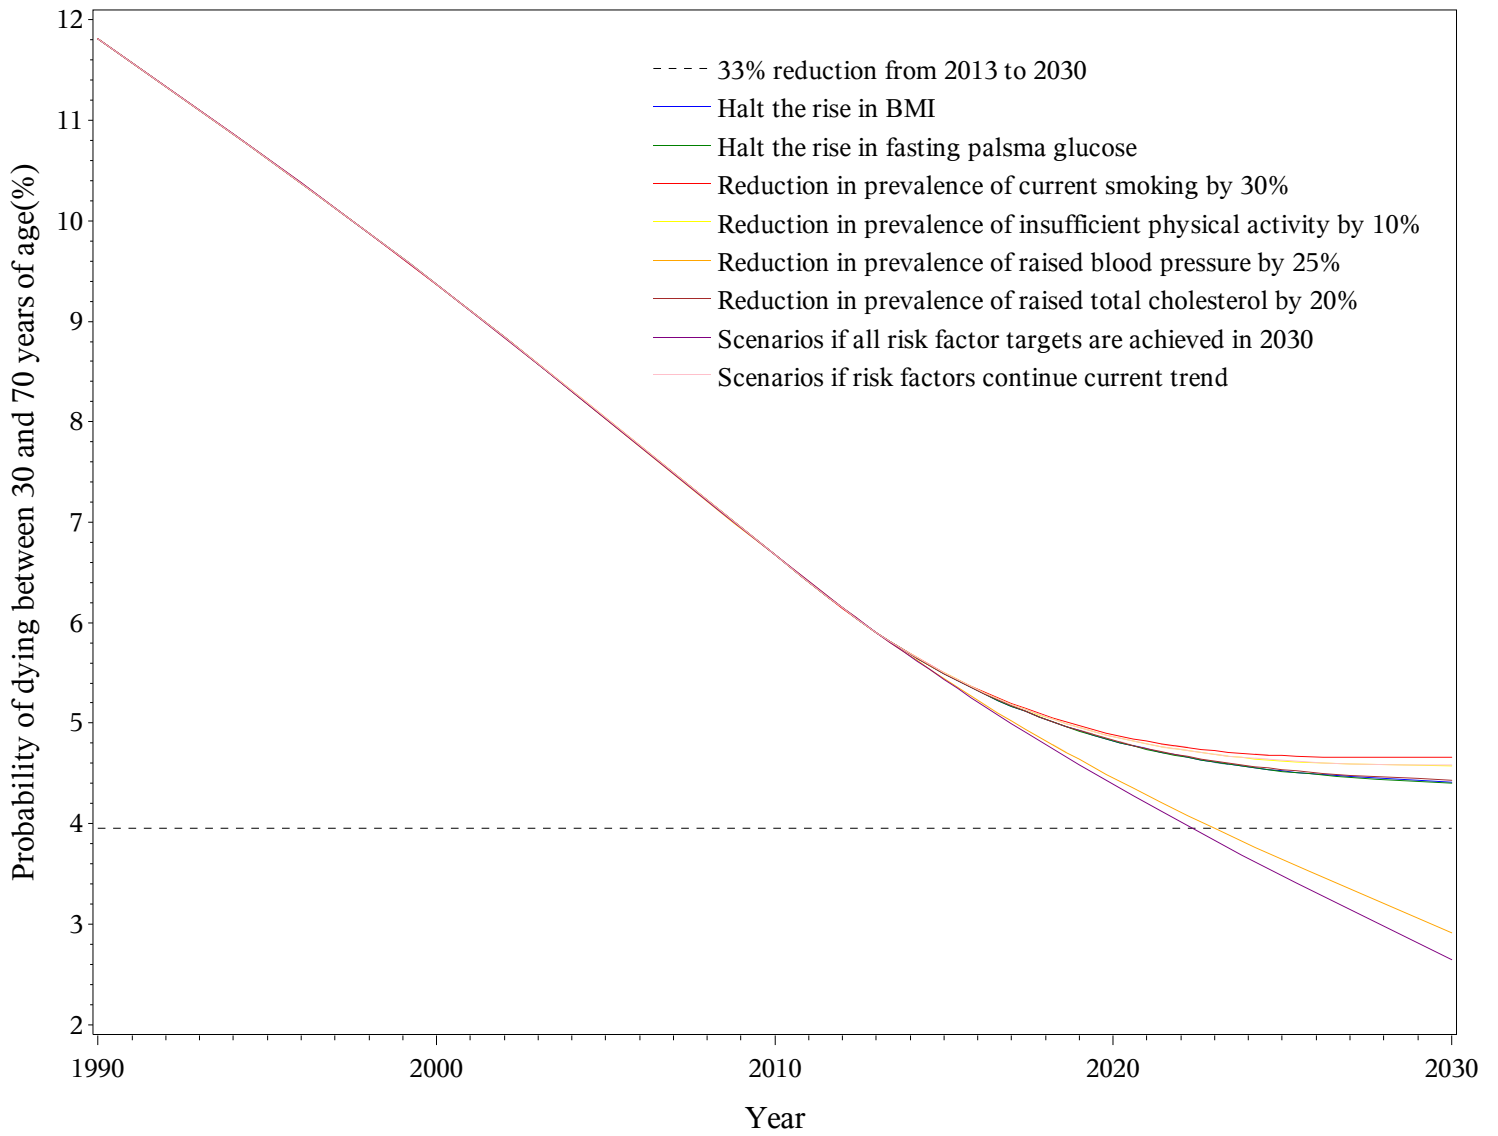

Figure S6

Probability of premature death due to Cancer between ages 30-70 in China from 1990 to 2030-Male

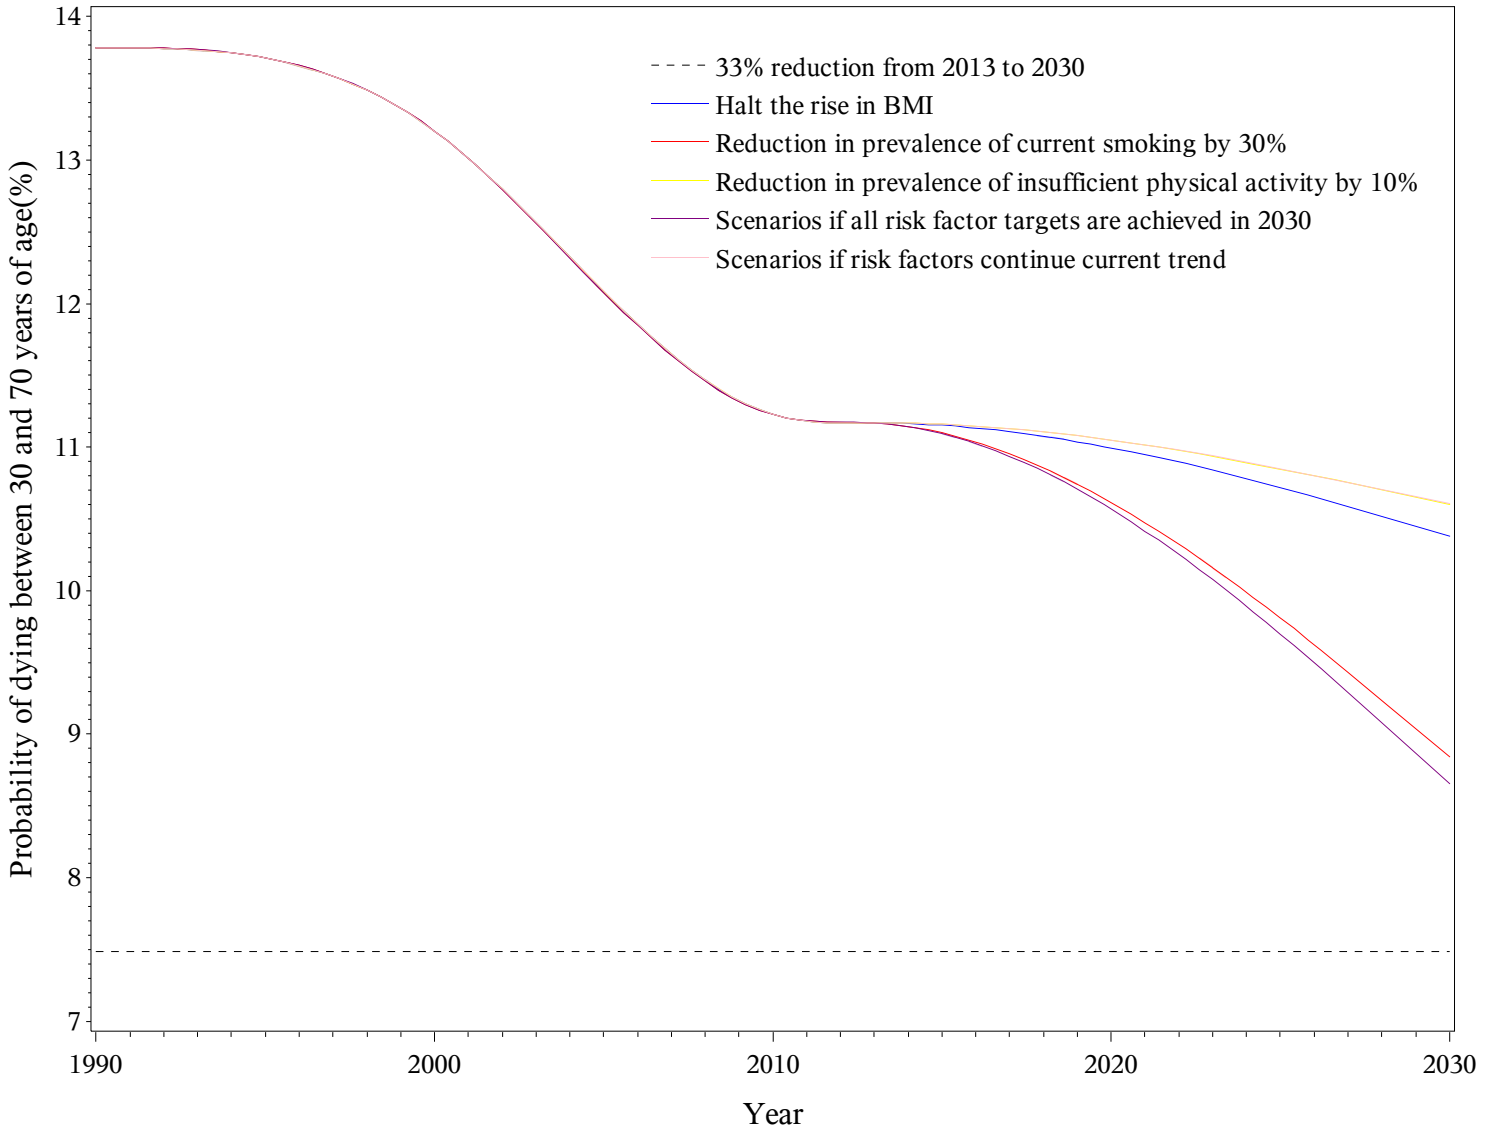

Figure S7

Probability of premature death due to Cancer between ages 30-70 in China from 1990 to 2030-Female

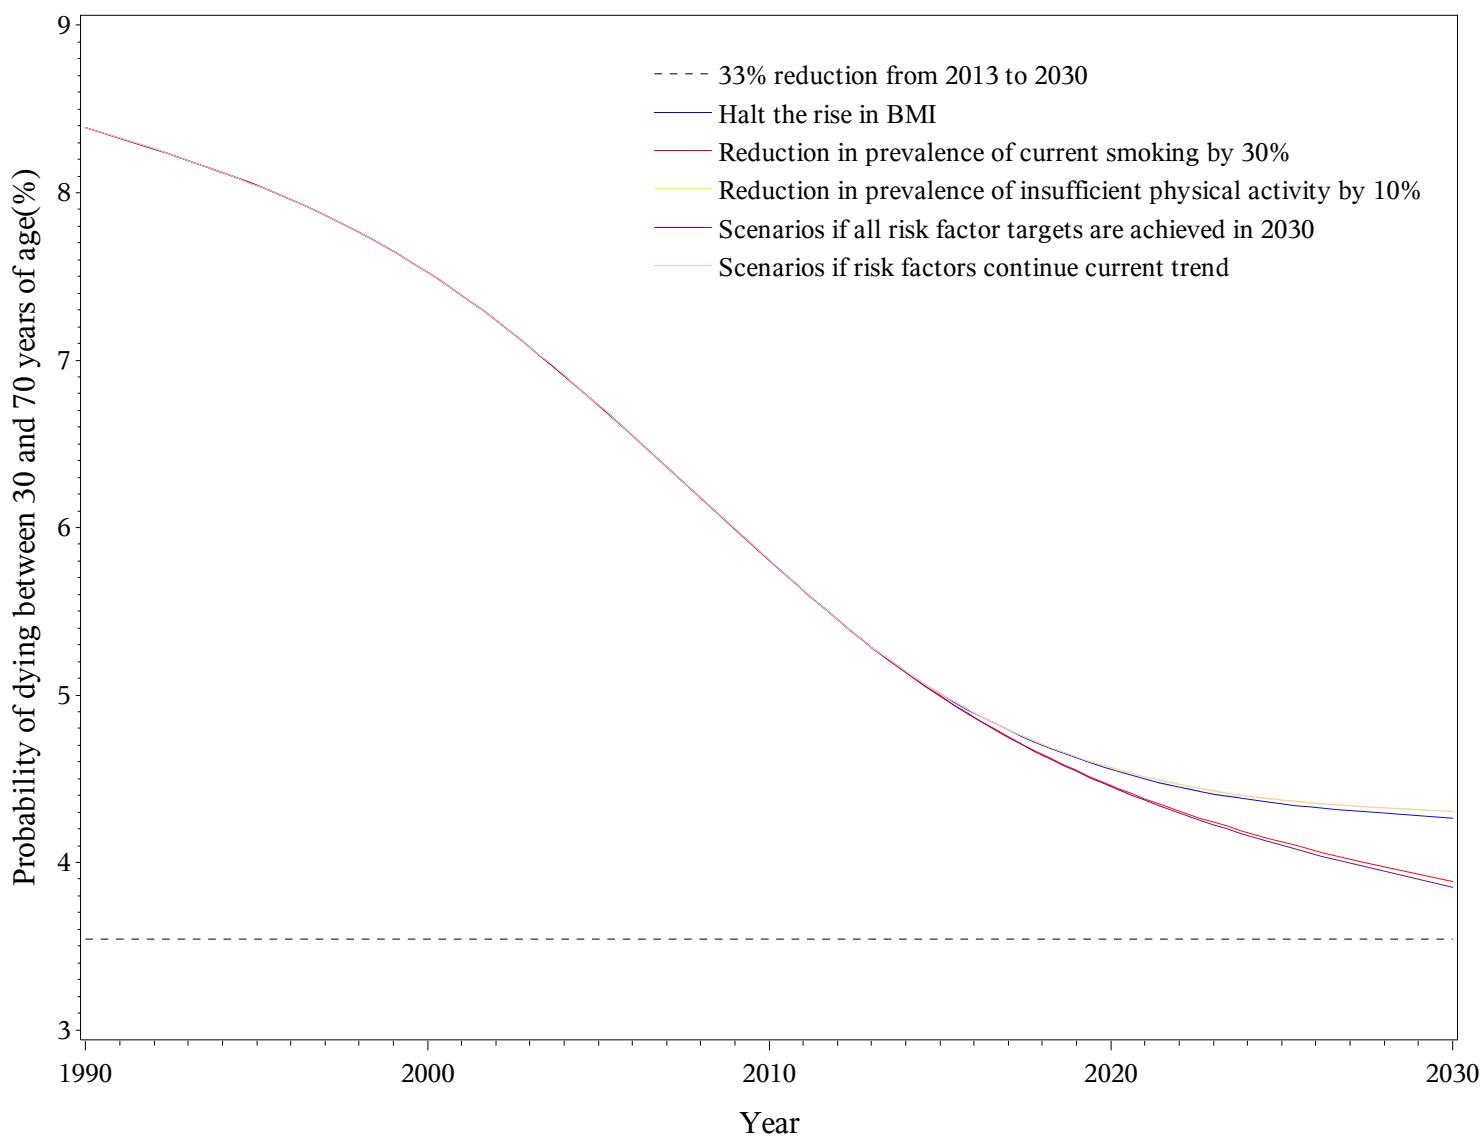

Figure S8

Probability of premature death due to Chronic respiratory disease between ages 30-70 in China from 1990 to 2030-Male

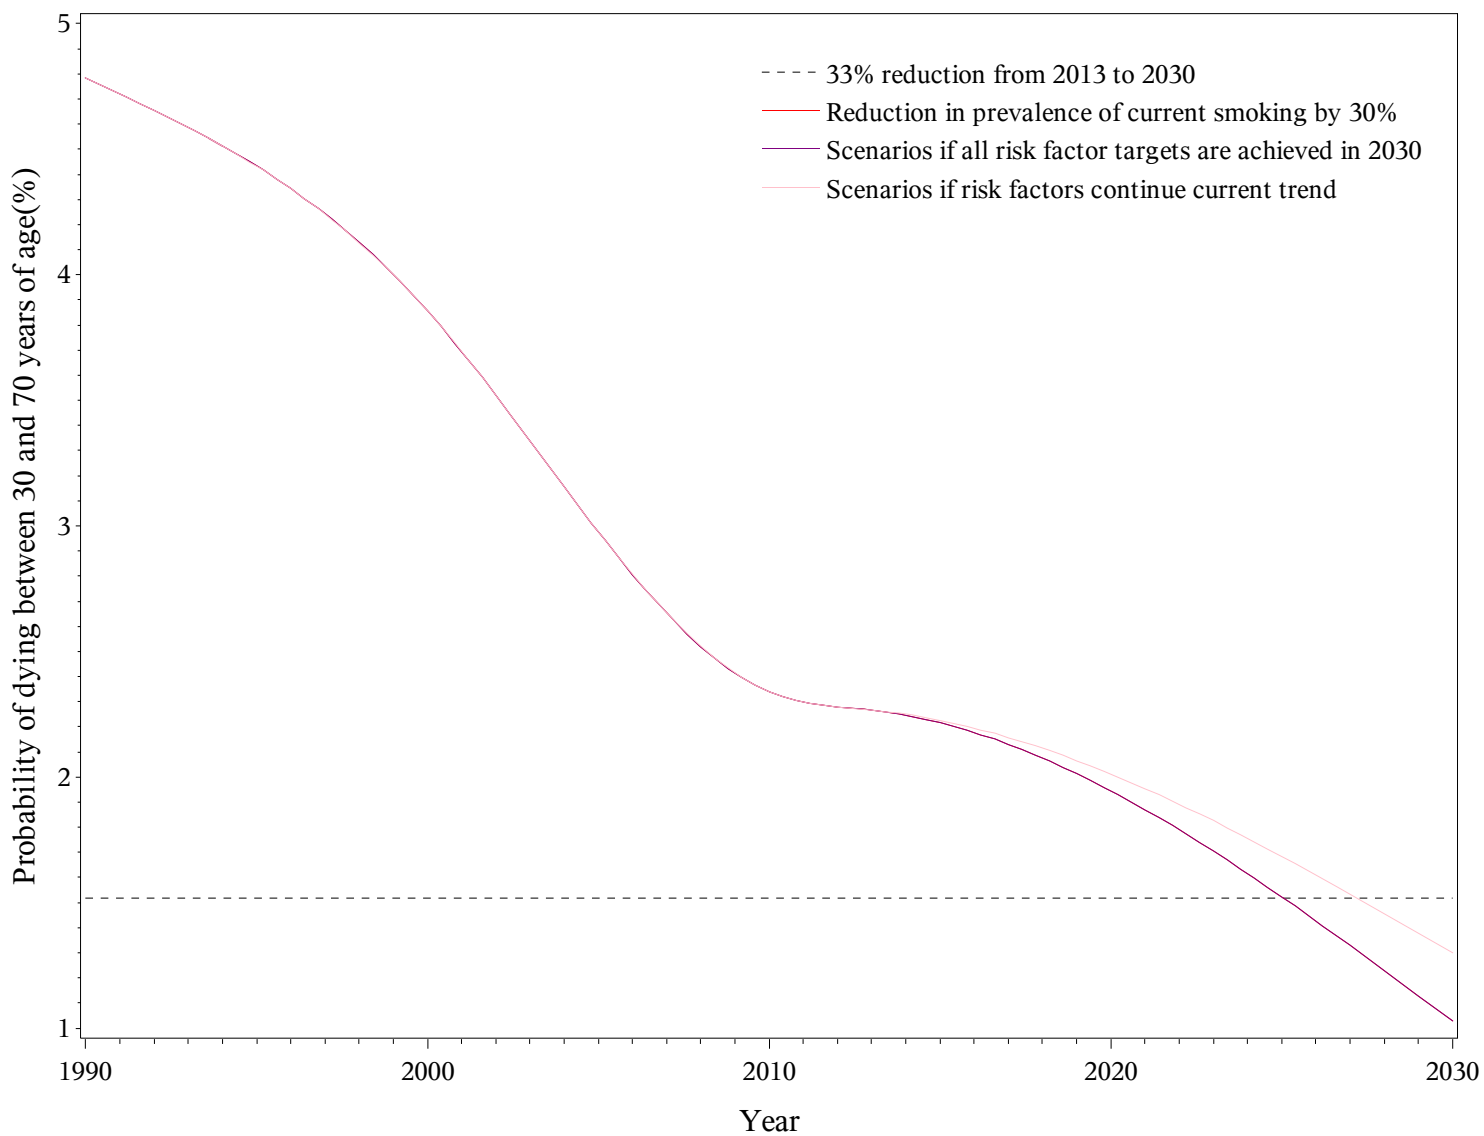



Figure S9

Probability of premature death due to Chronic respiratory disease between ages 30-70 in China from 1990 to 2030-Female

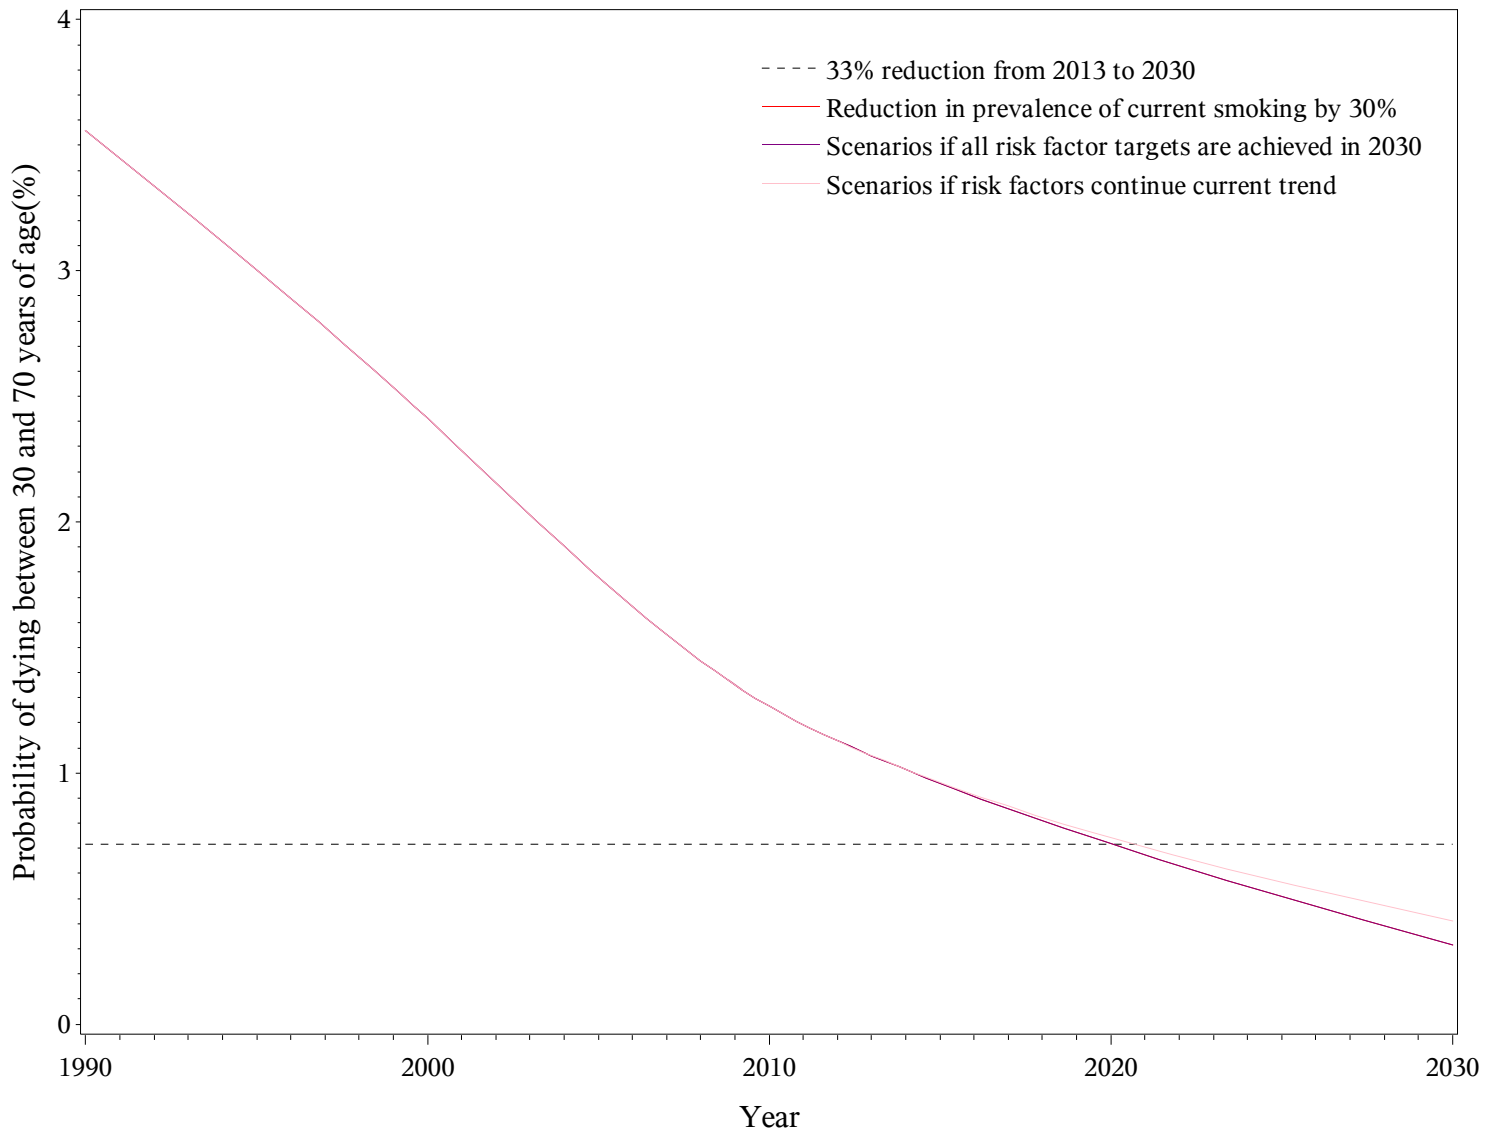

Figure S10

Probability of premature death due to Diabetes mellitus between ages 30-70 in China from 1990 to 2030-Male

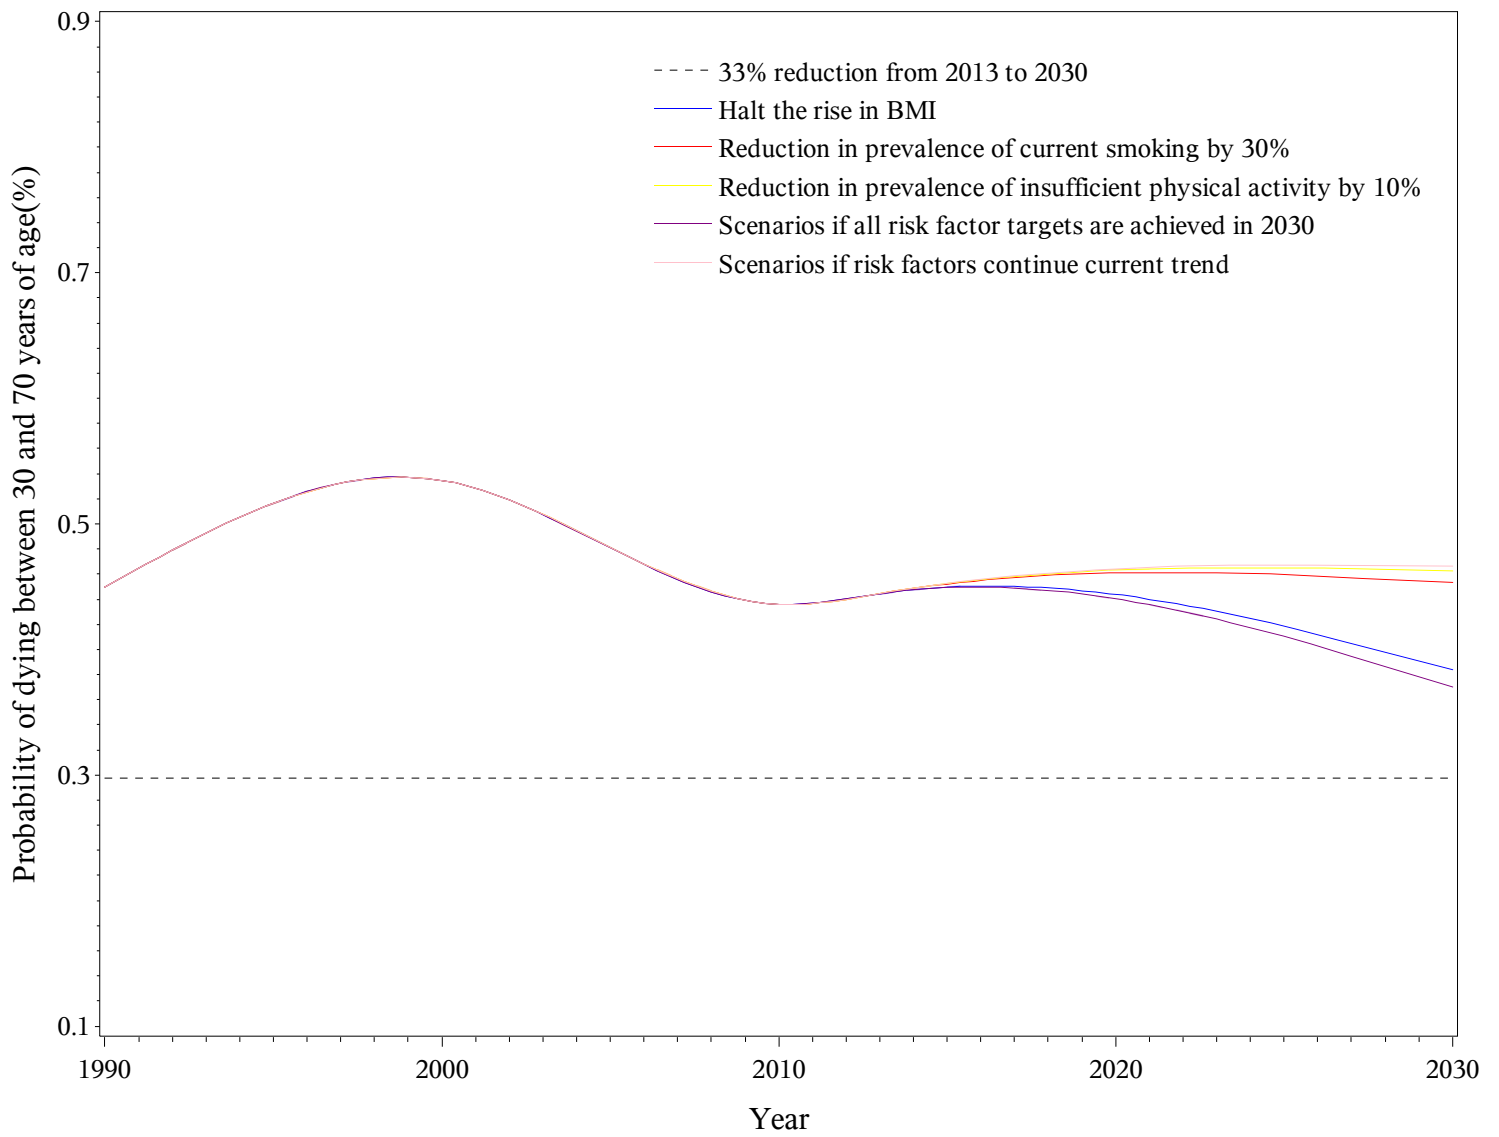

Figure S11

Probability of premature death due to Diabetes mellitus between ages 30-70 in China from 1990 to 2030-Female

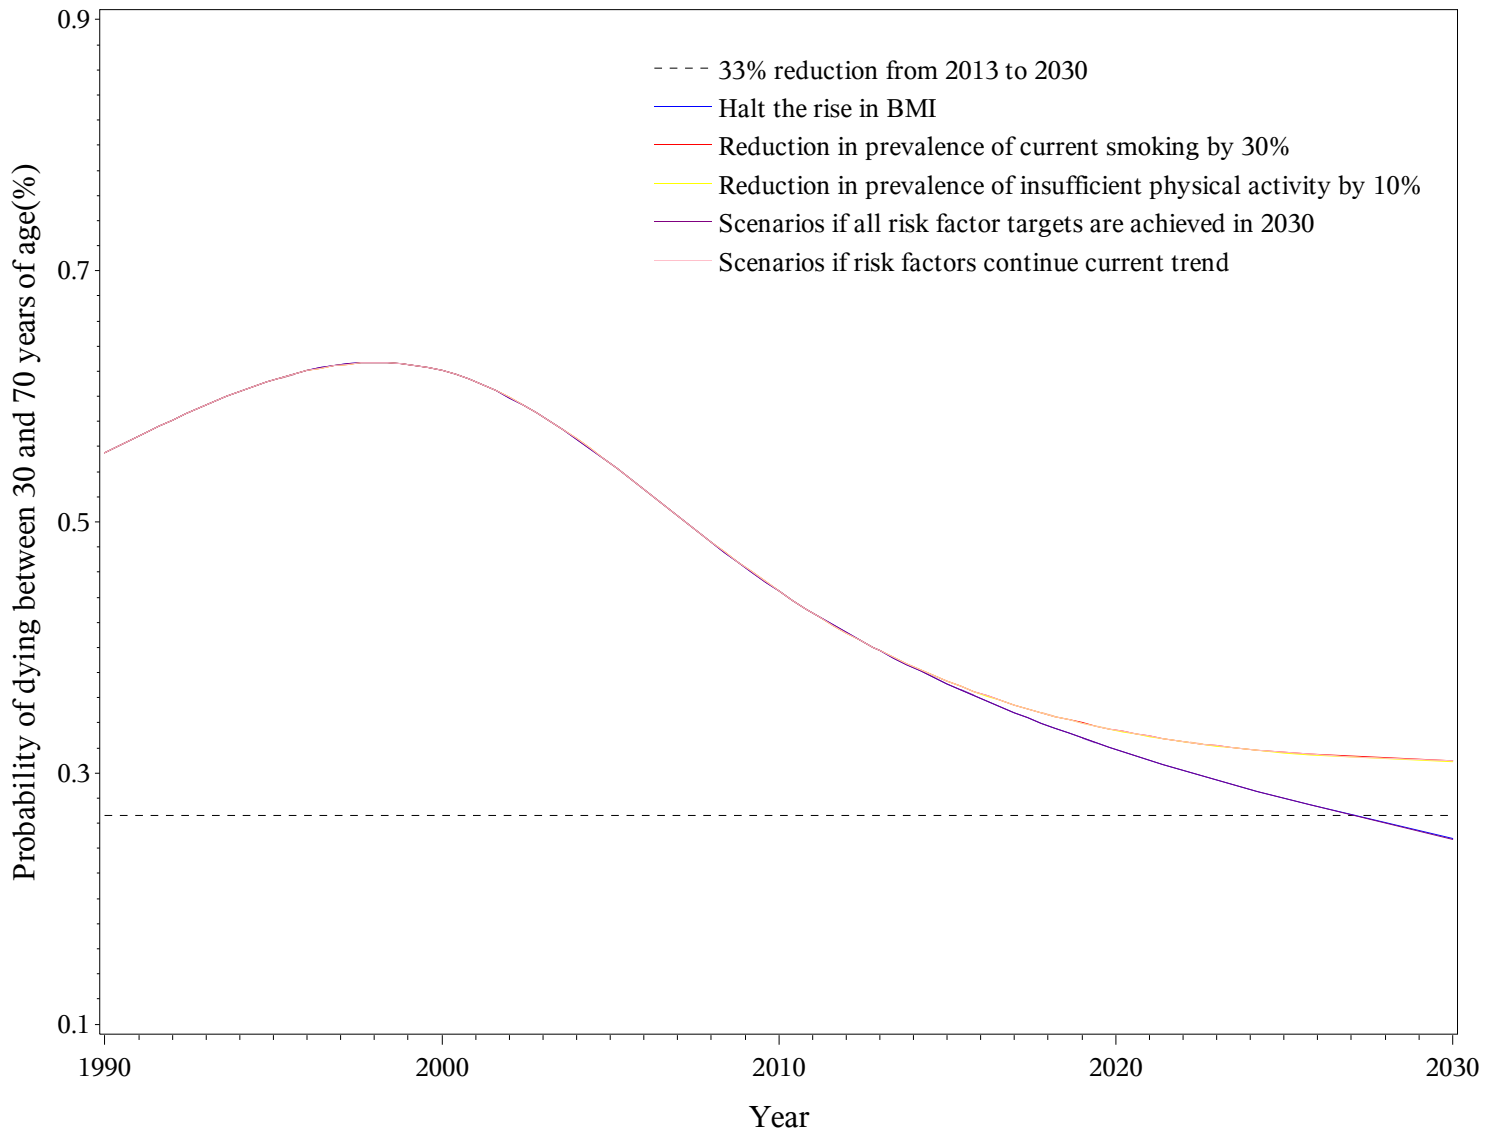

## Additional file Tables

Table S1 Deaths and premature mortality of main NCDs for population aged 30 to 70 in 2013 and projections for 2030 if risk factor trends continue

| Gender | Disease                             | 2013                            |                         | 2030                            |                                                        | % Change                            |                     |
|--------|-------------------------------------|---------------------------------|-------------------------|---------------------------------|--------------------------------------------------------|-------------------------------------|---------------------|
|        |                                     | Premature deaths (in thousands) | Premature mortality (%) | Premature deaths (in thousands) | Premature mortality if risk factor trends continue (%) | Absolute change in premature deaths | Premature mortality |
| Both   | Total                               | 3108                            | 19.8                    | 3521                            | 17.2                                                   | 13.3                                | -13.1               |
|        | CVD                                 | 1241                            | 8.6                     | 1518                            | 7.8                                                    | 22.3                                | -9.3                |
|        | Ischemic stroke                     | 174                             | 1.4                     | 276                             | 1.4                                                    | 58.6                                | 0                   |
|        | Haemorrhagic stroke                 | 487                             | 3.4                     | 513                             | 2.7                                                    | 5.3                                 | -20.6               |
|        | Ischemic heart disease              | 450                             | 3.2                     | 639                             | 3.4                                                    | 42                                  | 6.2                 |
|        | Hypertensive heart disease          | 58                              | 0.4                     | 50                              | 0.3                                                    | -13.8                               | -25                 |
|        | Other CVDs                          | 72                              | 0.5                     | 40                              | 0.2                                                    | -44.4                               | -60                 |
|        | Cancer                              | 1270                            | 8.3                     | 1444                            | 7.5                                                    | 13.7                                | -9.6                |
|        | Colon and rectum cancer             | 80                              | 0.6                     | 106                             | 0.6                                                    | 32.5                                | 0                   |
|        | Oesophageal cancer                  | 111                             | 0.8                     | 117                             | 0.6                                                    | 5.4                                 | -25                 |
|        | Liver cancer                        | 259                             | 1.6                     | 269                             | 1.5                                                    | 3.9                                 | -6.3                |
|        | Tracheal, bronchus, and lung cancer | 302                             | 2.2                     | 412                             | 2.2                                                    | 36.4                                | 0                   |
|        | Stomach cancer                      | 174                             | 1.3                     | 159                             | 0.9                                                    | -8.6                                | -30.8               |
|        | Other cancers                       | 344                             | 2.2                     | 382                             | 2.1                                                    | 11                                  | -4.5                |
|        | Diabetes mellitus                   | 59                              | 0.4                     | 75                              | 0.4                                                    | 27.1                                | 0                   |
|        | Chronic respiratory diseases        | 210                             | 1.7                     | 165                             | 0.9                                                    | -21.4                               | -47.1               |
|        | COPD                                | 179                             | 1.4                     | 130                             | 0.7                                                    | -27.4                               | -50                 |
|        | Other chronic respiratory diseases  | 32                              | 0.2                     | 35                              | 0.2                                                    | 9.4                                 | 0                   |
|        | Other NCDs                          | 328                             | 2.1                     | 319                             | 1.7                                                    | -2.7                                | -19                 |
| Men    | Total                               | 2043                            | 25.4                    | 2453                            | 23.5                                                   | 20.1                                | -7.5                |
|        | CVD                                 | 806                             | 11.2                    | 1041                            | 10.8                                                   | 29.2                                | -3.6                |
|        | Ischemic stroke                     | 113                             | 1.8                     | 184                             | 2                                                      | 62.8                                | 11.1                |
|        | Haemorrhagic stroke                 | 313                             | 4.5                     | 339                             | 3.6                                                    | 8.3                                 | -20                 |
|        | Ischemic heart disease              | 309                             | 4.3                     | 464                             | 4.9                                                    | 50.2                                | 14                  |

|       |                                     |      |      |      |      |       |       |
|-------|-------------------------------------|------|------|------|------|-------|-------|
|       | Hypertensive heart disease          | 35   | 0.5  | 32   | 0.4  | -8.6  | -20   |
|       | Other CVDs                          | 36   | 0.5  | 23   | 0.3  | -36.1 | -40   |
|       | Cancer                              | 847  | 11.2 | 1026 | 10.6 | 21.1  | -5.4  |
|       | Colon and rectum cancer             | 47   | 0.7  | 66   | 0.7  | 40.4  | 0     |
|       | Oesophageal cancer                  | 89   | 1.3  | 101  | 1.1  | 13.5  | -15.4 |
|       | Liver cancer                        | 202  | 2.5  | 217  | 2.3  | 7.4   | -8    |
|       | Tracheal, bronchus, and lung cancer | 220  | 3.2  | 320  | 3.5  | 45.5  | 9.4   |
|       | Stomach cancer                      | 127  | 1.9  | 124  | 1.4  | -2.4  | -26.3 |
|       | Other cancers                       | 162  | 2.1  | 198  | 2.1  | 22.2  | 0     |
|       | Diabetes mellitus                   | 30   | 0.4  | 43   | 0.5  | 43.3  | 25    |
|       | Chronic respiratory diseases        | 138  | 2.3  | 119  | 1.3  | -13.8 | -43.5 |
|       | COPD                                | 116  | 1.9  | 92   | 1    | -20.7 | -47.4 |
|       | Other chronic respiratory diseases  | 22   | 0.3  | 27   | 0.3  | 22.7  | 0     |
|       | Other NCDs                          | 222  | 2.8  | 224  | 2.4  | 0.9   | -14.3 |
| Women | Total                               | 1065 | 13.4 | 1068 | 10.2 | 0.3   | -23.9 |
|       | CVD                                 | 435  | 5.9  | 478  | 4.6  | 9.9   | -22   |
|       | Ischemic stroke                     | 60   | 0.9  | 93   | 0.9  | 55    | 0     |
|       | Haemorrhagic stroke                 | 174  | 2.4  | 174  | 1.7  | 0     | -29.2 |
|       | Ischemic heart disease              | 141  | 2    | 175  | 1.7  | 24.1  | -15   |
|       | Hypertensive heart disease          | 23   | 0.3  | 18   | 0.2  | -21.7 | -33.3 |
|       | Other CVDs                          | 36   | 0.5  | 17   | 0.2  | -52.8 | -60   |
|       | Cancer                              | 422  | 5.3  | 418  | 4.3  | -0.9  | -18.9 |
|       | Colon and rectum cancer             | 33   | 0.4  | 39   | 0.4  | 18.2  | 0     |
|       | Oesophageal cancer                  | 22   | 0.3  | 16   | 0.2  | -27.3 | -33.3 |
|       | Liver cancer                        | 56   | 0.7  | 52   | 0.5  | -7.1  | -28.6 |
|       | Tracheal, bronchus, and lung cancer | 82   | 1.1  | 92   | 0.9  | 12.2  | -18.2 |
|       | Stomach cancer                      | 47   | 0.6  | 34   | 0.4  | -27.7 | -33.3 |
|       | Other cancers                       | 183  | 2.2  | 184  | 2    | 0.5   | -9.1  |
|       | Diabetes mellitus                   | 28   | 0.4  | 32   | 0.3  | 14.3  | -25   |
|       | Chronic respiratory diseases        | 72   | 1.1  | 45   | 0.4  | -37.5 | -63.6 |
|       | COPD                                | 62   | 0.9  | 37   | 0.3  | -40.3 | -66.7 |
|       | Other chronic respiratory diseases  | 10   | 0.1  | 8    | 0.1  | -20   | 0     |
|       | Other NCDs                          | 108  | 1.4  | 95   | 1    | -12   | -28.6 |

Table S2 Reduction in deaths of NCDs for population aged 30 to 70 in 2030 with different risk factor scenarios (in thousands).

|                            |                                     | Smoking | Physical activity | High BMI | Fasting glucose | Total cholesterol | SBP   | All targets achieved |
|----------------------------|-------------------------------------|---------|-------------------|----------|-----------------|-------------------|-------|----------------------|
| Both                       | Total                               | 326.0   | 7.8               | 95.6     | 57.4            | 52.7              | 564.1 | 998.8                |
|                            | CVD                                 | 66.6    | 6.7               | 54.9     | 57.4            | 52.7              | 564.1 | 703.1                |
|                            | Ischaemic stroke                    | 10.7    | 2.2               | 5.6      | 9.3             | 7.6               | 114.4 | 133.8                |
|                            | Haemorrhagic stroke                 | 21.8    | 0                 | 14.3     | 19.1            | 0.0               | 228.3 | 256.9                |
|                            | Ischaemic heart disease             | 32.2    | 4.5               | 27.0     | 29.0            | 45.1              | 221.3 | 302.8                |
|                            | Hypertensive heart disease          | 2.0     | 0                 | 8.0      | 0               | 0                 | 0     | 9.7                  |
|                            | Other CVD                           | -       | -                 | -        | -               | -                 | -     | -                    |
|                            | Cancer                              | 222.4   | 0.6               | 26.9     | 0               | 0                 | 0     | 244.8                |
|                            | Colon and rectum cancer             | 8.3     | 0.6               | 3.1      | 0               | 0                 | 0     | 11.7                 |
|                            | Oesophageal cancer                  | 29.6    | 0                 | 8.3      | 0               | 0                 | 0     | 35.8                 |
|                            | Liver cancer                        | 45.6    | 0                 | 15.5     | 0               | 0                 | 0     | 58.5                 |
|                            | Tracheal, bronchus, and lung cancer | 117.5   | 0                 | 0        | 0               | 0                 | 0     | 117.5                |
|                            | Stomach cancer                      | 21.4    | 0                 | 0        | 0               | 0                 | 0     | 21.4                 |
|                            | Other Cancer                        | -       | -                 | -        | -               | -                 | -     | -                    |
|                            | Diabetes mellitus                   | 1.2     | 0.4               | 13.8     | 0               | 0                 | 0     | 15.1                 |
|                            | Chronic respiratory diseases        | 35.8    | 0                 | 0        | 0               | 0                 | 0     | 35.8                 |
|                            | COPD                                | 35.8    | 0                 | 0        | 0               | 0                 | 0     | 35.8                 |
|                            | Other Chronic respiratory diseases  | -       | -                 | -        | -               | -                 | -     | -                    |
|                            | Other NCDs                          | -       | -                 | -        | -               | -                 | -     | -                    |
|                            | Men                                 | Total   | 280.1             | 7.1      | 67.4            | 39.2              | 37.3  | 391.9                |
| CVD                        |                                     | 75.0    | 6.2               | 37.1     | 39.2            | 37.3              | 391.9 | 503.3                |
| Ischaemic stroke           |                                     | 12.4    | 2.0               | 3.5      | 6.0             | 4.9               | 76.7  | 92.3                 |
| Haemorrhagic stroke        |                                     | 25.0    | 0.0               | 9.3      | 12.4            | 0                 | 152.8 | 176.7                |
| Ischaemic heart disease    |                                     | 35.5    | 4.1               | 19.4     | 20.8            | 32.4              | 162.4 | 227.7                |
| Hypertensive heart disease |                                     | 2.2     | 0                 | 4.9      | 0               | 0                 | 0     | 6.7                  |
| Other CVD                  |                                     | -       | -                 | -        | -               | -                 | -     | -                    |
| Cancer                     |                                     | 178.7   | 0.5               | 22.8     | 0               | 0                 | 0     | 197.6                |
| Colon and rectum cancer    |                                     | 4.8     | 0.5               | 2.5      | 0               | 0                 | 0     | 7.6                  |
| Oesophageal cancer         |                                     | 25.6    | 0                 | 7.0      | 0               | 0                 | 0     | 30.9                 |

|       |                                     |      |     |      |      |      |       |       |
|-------|-------------------------------------|------|-----|------|------|------|-------|-------|
|       | Liver cancer                        | 39.0 | 0   | 13.3 | 0    | 0    | 0     | 49.9  |
|       | Tracheal, bronchus, and lung cancer | 91.6 | 0   | 0    | 0    | 0    | 0     | 91.6  |
|       | Stomach cancer                      | 17.7 | 0   | 0    | 0    | 0    | 0     | 17.7  |
|       | Other Cancer                        | -    | -   | -    | -    | -    | -     | -     |
|       | Diabetes mellitus                   | 1.2  | 0.4 | 7.5  | 0    | 0    | 0     | 8.8   |
|       | Chronic respiratory diseases        | 25.2 | 0   | 0    | 0    | 0    | 0     | 25.2  |
|       | COPD                                | 25.2 | 0   | 0    | 0    | 0    | 0     | 25.2  |
|       | Other Chronic respiratory diseases  | -    | -   | -    | -    | -    | -     | -     |
|       | Other NCDs                          | -    | -   | -    | -    | -    | -     | -     |
| Women | Total                               | 45.9 | 0.7 | 28.2 | 18.1 | 15.4 | 172.2 | 264.0 |
|       | CVD                                 | -8.4 | 0.6 | 17.8 | 18.1 | 15.4 | 172.2 | 199.8 |
|       | Ischaemic stroke                    | -1.7 | 0.2 | 2.0  | 3.3  | 2.7  | 37.7  | 41.6  |
|       | Haemorrhagic stroke                 | -3.2 | 0   | 5.0  | 6.6  | 0    | 75.5  | 80.2  |
|       | Ischaemic heart disease             | -3.3 | 0.4 | 7.6  | 8.2  | 12.7 | 58.9  | 75.1  |
|       | Hypertensive heart disease          | -0.2 | 0   | 3.1  | 0    | 0    | 0     | 3.0   |
|       | Other CVD                           | -    | -   | -    | -    | -    | -     | -     |
|       | Cancer                              | 43.8 | 0.1 | 4.1  | 0    | 0    | 0     | 47.3  |
|       | Colon and rectum cancer             | 3.5  | 0.1 | 0.6  | 0    | 0    | 0     | 4.1   |
|       | Oesophageal cancer                  | 4.0  | 0   | 1.2  | 0    | 0    | 0     | 4.9   |
|       | Liver cancer                        | 6.6  | 0   | 2.3  | 0    | 0    | 0     | 8.6   |
|       | Tracheal, bronchus, and lung cancer | 25.9 | 0   | 0    | 0    | 0    | 0     | 25.9  |
|       | Stomach cancer                      | 3.8  | 0   | 0    | 0    | 0    | 0     | 3.8   |
|       | Other Cancer                        | -    | -   | -    | -    | -    | -     | -     |
|       | Diabetes mellitus                   | 0    | 0.1 | 6.3  | 0    | 0    | 0     | 6.3   |
|       | Chronic respiratory diseases        | 10.6 | 0   | 0    | 0    | 0    | 0     | 10.6  |
|       | COPD                                | 10.6 | 0   | 0    | 0    | 0    | 0     | 10.6  |
|       | Other Chronic respiratory diseases  | -    | -   | -    | -    | -    | -     | -     |
|       | Other NCDs                          | -    | -   | -    | -    | -    | -     | -     |

Table S3 NCDs deaths (in thousands) in 2030 for population of all ages if risk factor trends continue

|                                     |                                     | 2013  | 2030   | % change |
|-------------------------------------|-------------------------------------|-------|--------|----------|
| Both                                | Total                               | 849.9 | 1216.1 | 43.1     |
|                                     | CVD                                 | 401.7 | 639.8  | 59.3     |
|                                     | Ischemic stroke                     | 79.6  | 161.8  | 103.3    |
|                                     | Haemorrhagic stroke                 | 127.7 | 155.7  | 21.9     |
|                                     | Ischemic heart disease              | 150.1 | 277.7  | 85.0     |
|                                     | Hypertensive heart disease          | 25.9  | 31.3   | 20.8     |
|                                     | Other CVD                           | 18.4  | 13.3   | -27.7    |
|                                     | Cancer                              | 226.1 | 308.4  | 36.4     |
|                                     | Colon and rectum cancer             | 16    | 26     | 62.5     |
|                                     | Oesophageal cancer                  | 20.9  | 25.5   | 22.0     |
|                                     | Liver cancer                        | 38.1  | 46.6   | 22.3     |
|                                     | Tracheal, bronchus, and lung cancer | 58.1  | 97.2   | 67.3     |
|                                     | Stomach cancer                      | 33.8  | 37.1   | 9.8      |
|                                     | Other Cancer                        | 59.2  | 76     | 28.4     |
|                                     | Diabetes mellitus                   | 14.4  | 25.3   | 75.7     |
|                                     | Chronic respiratory diseases        | 115.2 | 123.3  | 7.0      |
|                                     | COPD                                | 98.1  | 93.1   | -5.1     |
|                                     | Other Chronic respiratory diseases  | 17.1  | 30.2   | 76.6     |
|                                     | Other NCDs                          | 92.5  | 119.3  | 29.0     |
|                                     | Men                                 | Total | 487.1  | 695.6    |
| CVD                                 |                                     | 218.1 | 346.4  | 58.8     |
| Ischemic stroke                     |                                     | 42.8  | 81.5   | 90.4     |
| Haemorrhagic stroke                 |                                     | 71.7  | 85.5   | 19.2     |
| Ischemic heart disease              |                                     | 82.4  | 157.7  | 91.4     |
| Hypertensive heart disease          |                                     | 12.6  | 15.2   | 20.6     |
| Other CVD                           |                                     | 8.7   | 6.5    | -25.3    |
| Cancer                              |                                     | 145.5 | 201.7  | 38.6     |
| Colon and rectum cancer             |                                     | 8.9   | 14.4   | 61.8     |
| Oesophageal cancer                  |                                     | 15.6  | 20.2   | 29.5     |
| Liver cancer                        |                                     | 27.8  | 33.5   | 20.5     |
| Tracheal, bronchus, and lung cancer |                                     | 40.7  | 68.8   | 69.0     |
| Stomach cancer                      |                                     | 23.3  | 25.9   | 11.2     |
| Other Cancer                        |                                     | 29.3  | 38.9   | 32.8     |
| Diabetes mellitus                   |                                     | 6.7   | 11.6   | 73.1     |
| Chronic respiratory diseases        |                                     | 64.2  | 71.5   | 11.4     |
| COPD                                |                                     | 54.9  | 54     | -1.6     |
| Other Chronic respiratory diseases  |                                     | 9.3   | 17.5   | 88.2     |
| Other NCDs                          |                                     | 52.6  | 64.4   | 22.4     |
| Women                               |                                     | Total | 362.8  | 520.5    |



|                                     |       |       |       |
|-------------------------------------|-------|-------|-------|
| CVD                                 | 183.6 | 293.4 | 59.8  |
| Ischemic stroke                     | 36.9  | 80.2  | 117.3 |
| Haemorrhagic stroke                 | 55.9  | 70.3  | 25.8  |
| Ischemic heart disease              | 67.7  | 120   | 77.3  |
| Hypertensive heart disease          | 13.3  | 16.1  | 21.1  |
| Other CVD                           | 9.7   | 6.8   | -29.9 |
| Cancer                              | 80.6  | 106.6 | 32.3  |
| Colon and rectum cancer             | 7.1   | 11.6  | 63.4  |
| Oesophageal cancer                  | 5.3   | 5.3   | 0.0   |
| Liver cancer                        | 10.3  | 13.1  | 27.2  |
| Tracheal, bronchus, and lung cancer | 17.4  | 28.4  | 63.2  |
| Stomach cancer                      | 10.5  | 11.2  | 6.7   |
| Other Cancer                        | 30    | 37.1  | 23.7  |
| Diabetes mellitus                   | 7.6   | 13.7  | 80.3  |
| Chronic respiratory diseases        | 51    | 51.8  | 1.6   |
| COPD                                | 43.3  | 39.1  | -9.7  |
| Other Chronic respiratory diseases  | 7.7   | 12.7  | 64.9  |
| Other NCDs                          | 40    | 55    | 37.5  |

---

Table S4 Comparison of projected deaths and premature mortality of main NCDs in 2030 for population aged 30-69 between the scenarios in which risk factors continue past trend and the method of proportional change model.

|      |                                     | Deaths (in thousands)          |                           | Premature mortality (%)        |                           |
|------|-------------------------------------|--------------------------------|---------------------------|--------------------------------|---------------------------|
|      |                                     | if risk factor trends continue | Proportional Change model | if risk factor trends continue | Proportional Change model |
| Both | Total                               | 3521                           | 3336                      | 17.2                           | 16.4                      |
|      | CVD                                 | 1518                           | 1331                      | 7.8                            | 6.8                       |
|      | Ischemic stroke                     | 276                            | 241                       | 1.4                            | 1.3                       |
|      | Haemorrhagic stroke                 | 513                            | 459                       | 2.7                            | 2.4                       |
|      | Ischemic heart disease              | 639                            | 542                       | 3.4                            | 2.9                       |
|      | Hypertensive heart disease          | 50                             | 48                        | 0.3                            | 0.3                       |
|      | Other CVD                           | 40                             | 40                        | 0.2                            | 0.2                       |
|      | Cancer                              | 1444                           | 1446                      | 7.5                            | 7.6                       |
|      | Colon and rectum cancer             | 106                            | 106                       | 0.6                            | 0.6                       |
|      | Oesophageal cancer                  | 117                            | 117                       | 0.6                            | 0.6                       |
|      | Liver cancer                        | 269                            | 270                       | 1.5                            | 1.5                       |
|      | Tracheal, bronchus, and lung cancer | 412                            | 413                       | 2.2                            | 2.2                       |
|      | Stomach cancer                      | 159                            | 159                       | 0.9                            | 0.9                       |
|      | Other Cancer                        | 382                            | 382                       | 2.1                            | 2.1                       |
|      | Diabetes mellitus                   | 75                             | 75                        | 0.4                            | 0.4                       |
|      | Chronic respiratory diseases        | 165                            | 165                       | 0.9                            | 0.9                       |
|      | COPD                                | 130                            | 130                       | 0.7                            | 0.7                       |
|      | Other Chronic respiratory diseases  | 35                             | 35                        | 0.2                            | 0.2                       |
|      | Other NCDs                          | 319                            | 319                       | 1.7                            | 1.7                       |
|      |                                     |                                |                           | 0                              | 0.0                       |
| Men  | Total                               | 2453                           | 2354                      | 23.5                           | 22.7                      |
|      | CVD                                 | 1041                           | 941                       | 10.8                           | 9.8                       |
|      | Ischemic stroke                     | 184                            | 166                       | 2                              | 1.8                       |
|      | Haemorrhagic stroke                 | 339                            | 314                       | 3.6                            | 3.4                       |
|      | Ischemic heart disease              | 464                            | 406                       | 4.9                            | 4.4                       |
|      | Hypertensive heart disease          | 32                             | 32                        | 0.4                            | 0.4                       |

|        |                                     |      |      |      |      |
|--------|-------------------------------------|------|------|------|------|
|        | Other CVD                           | 23   | 23   | 0.3  | 0.3  |
|        | Cancer                              | 1026 | 1027 | 10.6 | 10.6 |
|        | Colon and rectum cancer             | 66   | 66   | 0.7  | 0.7  |
|        | Oesophageal cancer                  | 101  | 101  | 1.1  | 1.1  |
|        | Liver cancer                        | 217  | 217  | 2.3  | 2.3  |
|        | Tracheal, bronchus, and lung cancer | 320  | 320  | 3.5  | 3.5  |
|        | Stomach cancer                      | 124  | 124  | 1.4  | 1.4  |
|        | Other Cancer                        | 198  | 198  | 2.1  | 2.1  |
|        | Diabetes mellitus                   | 43   | 43   | 0.5  | 0.5  |
|        | Chronic respiratory diseases        | 119  | 119  | 1.3  | 1.3  |
|        | COPD                                | 92   | 92   | 1    | 1.0  |
|        | Other Chronic respiratory diseases  | 27   | 27   | 0.3  | 0.3  |
|        | Other NCDs                          | 224  | 224  | 2.4  | 2.4  |
|        |                                     |      |      | 0    | 0.0  |
| Female | Total                               | 1068 | 983  | 10.2 | 9.4  |
|        | CVD                                 | 478  | 390  | 4.6  | 3.7  |
|        | Ischemic stroke                     | 93   | 75   | 0.9  | 0.7  |
|        | Haemorrhagic stroke                 | 174  | 145  | 1.7  | 1.4  |
|        | Ischemic heart disease              | 175  | 136  | 1.7  | 1.3  |
|        | Hypertensive heart disease          | 18   | 17   | 0.2  | 0.2  |
|        | Other CVD                           | 17   | 17   | 0.2  | 0.2  |
|        | Cancer                              | 418  | 420  | 4.3  | 4.3  |
|        | Colon and rectum cancer             | 39   | 39   | 0.4  | 0.4  |
|        | Oesophageal cancer                  | 16   | 16   | 0.2  | 0.2  |
|        | Liver cancer                        | 52   | 52   | 0.5  | 0.5  |
|        | Tracheal, bronchus, and lung cancer | 92   | 93   | 0.9  | 0.9  |
|        | Stomach cancer                      | 34   | 35   | 0.4  | 0.4  |
|        | Other Cancer                        | 184  | 184  | 2    | 2.0  |
|        | Diabetes mellitus                   | 32   | 32   | 0.3  | 0.3  |
|        | Chronic respiratory diseases        | 45   | 45   | 0.4  | 0.4  |
|        | COPD                                | 37   | 38   | 0.3  | 0.3  |
|        | Other Chronic respiratory diseases  | 8    | 8    | 0.1  | 0.1  |
|        | Other NCDs                          | 95   | 95   | 1    | 1.0  |



Table S5 Means and SD of systolic blood pressure among Chinese population by age and sex in 1990, 2013, and 2030\*.

| Age | Male, mean (SD) – mm Hg |             |             | Female, mean (SD) – mm Hg |             |             |
|-----|-------------------------|-------------|-------------|---------------------------|-------------|-------------|
|     | 1990                    | 2013        | 2030*       | 1990                      | 2013        | 2030*       |
| 25- | 110.6(10.5)             | 124.0(14.0) | 135.0(17.3) | 105.0(9.7)                | 114.8(14.4) | 122.6(19.2) |
| 30- | 115.5(13.1)             | 124.9(14.8) | 132.4(16.2) | 108.5(11.9)               | 116.2(14.8) | 122.2(17.4) |
| 35- | 115.1(13.1)             | 126.8(15.9) | 136.1(18.5) | 107.4(11.8)               | 118.7(15.8) | 127.8(19.7) |
| 40- | 119.3(13.2)             | 127.7(16.5) | 134.3(19.5) | 115.6(12.5)               | 122.8(17.3) | 128.3(22.0) |
| 45- | 119.4(13.0)             | 130.2(17.9) | 138.9(22.7) | 116.1(12.5)               | 127.8(19.2) | 137.2(26.4) |
| 50- | 124.7(13.5)             | 132.9(18.9) | 139.3(24.3) | 125.5(13.7)               | 132.4(20.6) | 137.6(27.9) |
| 55- | 127.3(13.7)             | 135.6(19.9) | 142.1(26.2) | 127.2(13.7)               | 135.2(21.0) | 141.5(28.8) |
| 60- | 133.7(14.4)             | 138.0(20.4) | 141.2(26.4) | 134.5(14.5)               | 138.8(21.8) | 142.1(29.4) |
| 65- | 132.0(13.8)             | 141.1(21.4) | 148.2(29.6) | 135.6(14.4)               | 142.6(22.4) | 148.0(31.1) |
| 70- | 138.7(15.0)             | 142.9(21.6) | 146.1(28.3) | 140.1(15.3)               | 144.5(22.7) | 147.9(30.6) |
| 75- | 137.5(14.2)             | 143.1(21.7) | 147.4(29.6) | 143.0(15.1)               | 145.4(23.4) | 147.2(32.3) |
| 80+ | 140.3(15.1)             | 143.8(22.1) | 146.5(29.4) | 144.9(15.8)               | 145.7(24.0) | 146.4(32.7) |

\* Projection based on the assumption that past trends between 1990 and 2013 would continue to 2030.

Table S6 Means and SD of body mass index among Chinese population by age and sex in 1990, 2013, and 2030.

| Age | Male, mean (SD) – kg/m <sup>2</sup> |           |           | Female, mean (SD) – kg/m <sup>2</sup> |           |           |
|-----|-------------------------------------|-----------|-----------|---------------------------------------|-----------|-----------|
|     | 1990                                | 2013      | 2030*     | 1990                                  | 2013      | 2030*     |
| 25- | 20.9(2.7)                           | 23.0(3.3) | 24.7(3.9) | 21.3(2.7)                             | 21.9(3.3) | 22.3(3.9) |
| 30- | 21.6(2.8)                           | 23.5(3.2) | 25.0(3.6) | 21.9(2.7)                             | 22.7(3.3) | 23.1(3.8) |
| 35- | 21.6(2.7)                           | 23.8(3.2) | 25.5(3.5) | 21.9(2.8)                             | 23.3(3.3) | 24.2(3.9) |
| 40- | 21.8(2.9)                           | 24.0(3.1) | 25.8(3.2) | 22.5(2.9)                             | 23.8(3.2) | 24.8(3.4) |
| 45- | 21.8(3.0)                           | 24.3(3.0) | 26.1(2.9) | 22.3(3.1)                             | 24.3(3.3) | 25.9(3.4) |
| 50- | 21.9(3.1)                           | 23.9(3.0) | 25.5(2.9) | 22.4(3.4)                             | 24.4(3.3) | 25.9(3.2) |
| 55- | 22.4(3.1)                           | 23.8(2.9) | 24.8(2.8) | 22.5(3.8)                             | 24.4(3.5) | 25.9(3.2) |
| 60- | 22.1(3.0)                           | 23.6(3.1) | 24.6(3.1) | 22.5(3.6)                             | 24.3(3.6) | 25.6(3.5) |
| 65- | 22.2(3.1)                           | 23.5(3.1) | 24.4(3.1) | 22.2(3.6)                             | 24.1(3.8) | 25.5(3.9) |
| 70- | 21.5(3.2)                           | 23.2(3.2) | 24.6(3.2) | 22.0(3.2)                             | 23.9(4.1) | 25.5(4.8) |
| 75- | 21.0(3.2)                           | 22.7(3.6) | 24.1(3.9) | 20.6(3.7)                             | 23.2(4.1) | 25.5(4.4) |
| 80+ | 20.8(3.4)                           | 22.0(3.6) | 23.3(3.7) | 21.1(3.2)                             | 22.3(3.8) | 23.4(4.3) |

\* Projection based on the assumption that past trends between 1990 and 2013 would continue to 2030.

Table S7 Means and SD of total cholesterol among Chinese population by age and sex in 1990, 2013, and 2030.

| Age | Male, mean (SD) – mmol/L |          |          | Female, mean (SD) – mmol/L |          |          |
|-----|--------------------------|----------|----------|----------------------------|----------|----------|
|     | 1990                     | 2013     | 2030*    | 1990                       | 2013     | 2030*    |
| 25- | 3.8(0.9)                 | 3.9(1.0) | 3.9(1.0) | 3.8(0.9)                   | 3.7(0.9) | 3.7(0.8) |
| 30- | 4.2(1.1)                 | 4.1(1.0) | 4.1(1.0) | 4.0(1.0)                   | 3.8(0.9) | 3.8(0.8) |
| 35- | 4.3(1.1)                 | 4.2(1.0) | 4.2(1.0) | 4.1(1.0)                   | 3.8(0.9) | 3.8(0.9) |
| 40- | 4.4(1.1)                 | 4.2(1.1) | 4.2(1.0) | 4.3(1.1)                   | 4.0(1.0) | 4.0(0.9) |
| 45- | 4.4(1.2)                 | 4.3(1.1) | 4.3(1.1) | 4.5(1.2)                   | 4.1(1.0) | 4.1(0.9) |
| 50- | 4.6(1.2)                 | 4.3(1.1) | 4.3(1.0) | 4.7(1.3)                   | 4.4(1.1) | 4.4(1.0) |
| 55- | 4.5(1.2)                 | 4.2(1.1) | 4.2(1.0) | 4.9(1.3)                   | 4.4(1.2) | 4.4(1.0) |
| 60- | 4.7(1.2)                 | 4.2(1.1) | 4.2(0.9) | 5.0(1.4)                   | 4.5(1.2) | 4.5(1.0) |
| 65- | 4.3(1.1)                 | 4.2(1.1) | 4.2(1.0) | 4.8(1.3)                   | 4.5(1.2) | 4.5(1.1) |
| 70- | 4.5(1.2)                 | 4.2(1.0) | 4.2(1.0) | 5.0(1.4)                   | 4.5(1.2) | 4.5(1.0) |
| 75- | 4.1(1.0)                 | 4.3(1.1) | 4.3(1.1) | 4.5(1.2)                   | 4.6(1.2) | 4.6(1.2) |
| 80+ | 4.2(1.0)                 | 4.1(1.0) | 4.1(1.0) | 4.8(1.3)                   | 4.4(1.1) | 4.4(1.1) |

\* Projection based on the assumption that past trends between 1990 and 2013 would continue to 2030.

Table S8 Means and SD of fasting plasma glucose among Chinese population by age and sex in 1990, 2013, and 2030.

| Age | Male, mean (SD) – mmol/L |          |          | Female, mean (SD) – mmol/L |          |          |
|-----|--------------------------|----------|----------|----------------------------|----------|----------|
|     | 1990                     | 2013     | 2030*    | 1990                       | 2013     | 2030*    |
| 25- | 5.0(1.2)                 | 5.3(1.3) | 5.5(1.4) | 4.9(1.2)                   | 5.1(1.3) | 5.3(1.3) |
| 30- | 5.0(1.2)                 | 5.4(1.4) | 5.7(1.5) | 4.9(1.2)                   | 5.2(1.3) | 5.5(1.4) |
| 35- | 5.2(1.3)                 | 5.5(1.4) | 5.7(1.5) | 5.1(1.3)                   | 5.3(1.3) | 5.4(1.4) |
| 40- | 5.2(1.3)                 | 5.7(1.5) | 6.1(1.6) | 5.0(1.2)                   | 5.4(1.4) | 5.8(1.5) |
| 45- | 5.4(1.4)                 | 5.8(1.5) | 6.1(1.7) | 5.2(1.3)                   | 5.5(1.4) | 5.8(1.5) |
| 50- | 5.4(1.4)                 | 5.9(1.6) | 6.2(1.7) | 5.2(1.3)                   | 5.7(1.5) | 6.1(1.7) |
| 55- | 5.5(1.4)                 | 5.8(1.5) | 6.0(1.6) | 5.5(1.4)                   | 5.8(1.5) | 6.0(1.6) |
| 60- | 5.5(1.4)                 | 5.9(1.6) | 6.1(1.7) | 5.6(1.4)                   | 5.9(1.6) | 6.1(1.7) |
| 65- | 5.6(1.5)                 | 5.8(1.6) | 6.0(1.6) | 5.6(1.5)                   | 5.9(1.6) | 6.1(1.7) |
| 70- | 5.7(1.5)                 | 5.8(1.5) | 5.8(1.5) | 5.6(1.4)                   | 5.9(1.6) | 6.3(1.7) |
| 75- | 5.6(1.5)                 | 5.8(1.6) | 6.1(1.6) | 5.7(1.5)                   | 5.7(1.5) | 5.8(1.5) |
| 80+ | 5.5(1.4)                 | 5.6(1.5) | 5.6(1.5) | 5.4(1.4)                   | 5.9(1.6) | 6.2(1.7) |

\* Projection based on the assumption that past trends between 1990 and 2013 would continue to 2030.

Table S9 Distribution of physical activity levels among Chinese population by age and sex in 1990, 2013, and 2030.

| Age | Physical activity level<br>(METs·min/week) | Male – % |      |       | Female – % |      |       |
|-----|--------------------------------------------|----------|------|-------|------------|------|-------|
|     |                                            | 1990     | 2013 | 2030* | 1990       | 2013 | 2030* |
| 25- | <600                                       | 19.8     | 21.6 | 23.6  | 9.4        | 11.0 | 12.3  |
|     | 600-3,999                                  | 32.3     | 30.7 | 29.3  | 34.5       | 34.4 | 34.3  |
|     | 4,000-7,999                                | 18.7     | 18.7 | 18.6  | 17.8       | 16.5 | 15.5  |
|     | >=8,000                                    | 29.2     | 29.0 | 28.5  | 38.3       | 38.1 | 37.9  |
| 30- | <600                                       | 20.6     | 21.1 | 22.2  | 7.9        | 9.1  | 10.0  |
|     | 600-3,999                                  | 30.8     | 29.5 | 28.4  | 34.2       | 34.1 | 34.0  |
|     | 4,000-7,999                                | 18.1     | 18.1 | 17.9  | 17.8       | 17.0 | 16.5  |
|     | >=8,000                                    | 30.5     | 31.3 | 31.6  | 40.1       | 39.8 | 39.5  |
| 35- | <600                                       | 20.2     | 20.5 | 21.5  | 7.0        | 7.9  | 8.6   |
|     | 600-3,999                                  | 29.7     | 28.2 | 26.7  | 33.5       | 32.5 | 31.8  |
|     | 4,000-7,999                                | 18.0     | 18.0 | 17.8  | 17.6       | 17.3 | 17.0  |
|     | >=8,000                                    | 32.1     | 33.3 | 34.0  | 41.9       | 42.3 | 42.7  |
| 40- | <600                                       | 18.6     | 19.6 | 21.3  | 6.8        | 7.4  | 8.0   |
|     | 600-3,999                                  | 29.2     | 26.6 | 24.5  | 32.6       | 29.8 | 27.8  |
|     | 4,000-7,999                                | 18.3     | 18.5 | 18.4  | 17.4       | 17.2 | 17.0  |
|     | >=8,000                                    | 33.9     | 35.3 | 35.8  | 43.2       | 45.6 | 47.2  |
| 45- | <600                                       | 17.2     | 18.4 | 20.3  | 6.8        | 7.2  | 7.6   |
|     | 600-3,999                                  | 30.3     | 27.3 | 24.9  | 33.6       | 30.3 | 27.9  |
|     | 4,000-7,999                                | 18.5     | 18.8 | 18.7  | 17.8       | 17.6 | 17.4  |
|     | >=8,000                                    | 34.0     | 35.5 | 36.1  | 41.8       | 44.9 | 47.1  |
| 50- | <600                                       | 16.0     | 17.0 | 18.4  | 7.1        | 7.3  | 7.4   |
|     | 600-3,999                                  | 33.4     | 30.4 | 28.1  | 36.3       | 33.8 | 31.9  |
|     | 4,000-7,999                                | 18.6     | 18.8 | 18.7  | 18.9       | 18.4 | 18.1  |
|     | >=8,000                                    | 32.0     | 33.8 | 34.8  | 37.7       | 40.5 | 42.6  |
| 55- | <600                                       | 16.3     | 18.1 | 19.8  | 8.0        | 8.3  | 8.2   |
|     | 600-3,999                                  | 37.8     | 34.6 | 32.2  | 40.2       | 37.6 | 35.7  |
|     | 4,000-7,999                                | 18.4     | 18.5 | 18.5  | 19.3       | 18.9 | 18.5  |
|     | >=8,000                                    | 27.5     | 28.8 | 29.5  | 32.5       | 35.2 | 37.6  |
| 60- | <600                                       | 18.1     | 21.6 | 24.6  | 9.7        | 10.1 | 9.9   |
|     | 600-3,999                                  | 43.9     | 40.2 | 37.3  | 45.6       | 42.1 | 39.6  |
|     | 4,000-7,999                                | 18.0     | 18.1 | 18.0  | 19.0       | 19.0 | 18.9  |
|     | >=8,000                                    | 20.0     | 20.1 | 20.1  | 25.7       | 28.8 | 31.6  |
| 65- | <600                                       | 20.3     | 24.9 | 28.8  | 11.6       | 12.2 | 12.1  |
|     | 600-3,999                                  | 46.8     | 42.6 | 39.4  | 48.4       | 44.5 | 41.8  |
|     | 4,000-7,999                                | 17.4     | 17.3 | 17.1  | 18.6       | 18.7 | 18.8  |
|     | >=8,000                                    | 15.5     | 15.2 | 14.7  | 21.4       | 24.6 | 27.3  |
| 70- | <600                                       | 22.6     | 28.0 | 32.5  | 13.7       | 14.7 | 15.0  |
|     | 600-3,999                                  | 46.2     | 41.6 | 38.0  | 48.3       | 44.3 | 41.6  |
|     | 4,000-7,999                                | 16.6     | 16.4 | 16.0  | 17.6       | 17.6 | 17.6  |
|     | >=8,000                                    | 14.6     | 14.0 | 13.5  | 20.4       | 23.4 | 25.8  |
| 75- | <600                                       | 25.1     | 31.0 | 36.2  | 15.8       | 17.2 | 18.0  |
|     | 600-3,999                                  | 45.5     | 40.6 | 36.6  | 48.1       | 44.2 | 41.5  |
|     | 4,000-7,999                                | 15.8     | 15.4 | 14.9  | 16.7       | 16.5 | 16.4  |
|     | >=8,000                                    | 13.6     | 13.0 | 12.3  | 19.4       | 22.1 | 24.1  |
| 80+ | <600                                       | 31.5     | 39.0 | 45.7  | 20.8       | 23.6 | 25.7  |
|     | 600-3,999                                  | 43.8     | 37.9 | 33.1  | 48.5       | 44.7 | 41.8  |
|     | 4,000-7,999                                | 13.6     | 12.9 | 12.0  | 14.2       | 13.4 | 12.9  |
|     | >=8,000                                    | 11.1     | 10.2 | 9.2   | 16.5       | 18.3 | 19.6  |

\* Projection based on the assumption that past trends between 1990 and 2013 would continue to 2030.

Table S10 Smoking prevalence among Chinese population by age and sex in 1990, 2013, and 2030.

| Age | Male – % |      |       | Female – % |      |       |
|-----|----------|------|-------|------------|------|-------|
|     | 1990     | 2013 | 2030* | 1990       | 2013 | 2030* |
| 30- | 61.2     | 44.0 | 34.9  | 1.9        | 0.7  | 0.4   |
| 35- | 65.1     | 47.7 | 38.0  | 2.8        | 1.0  | 0.5   |
| 40- | 64.8     | 51.6 | 45.7  | 4.3        | 1.4  | 0.6   |
| 45- | 65.6     | 55.4 | 49.9  | 6.8        | 2.1  | 0.7   |
| 50- | 66.5     | 56.9 | 50.0  | 9.6        | 2.5  | 0.9   |
| 55- | 65.5     | 55.7 | 49.0  | 11.3       | 2.6  | 0.9   |
| 60- | 63.3     | 52.3 | 44.8  | 13.4       | 3.0  | 1.0   |
| 65- | 61.4     | 46.8 | 38.1  | 15.3       | 3.6  | 1.6   |
| 70- | 59.2     | 41.0 | 30.0  | 15.1       | 5.2  | 2.4   |
| 75- | 52.7     | 35.4 | 26.4  | 13.9       | 6.0  | 3.8   |
| 80+ | 51.1     | 33.2 | 24.8  | 12.1       | 5.6  | 3.1   |

\* Projection based on the assumption that past trends between 1990 and 2013 would continue to 2030.
